# Supplementary material for: Novel atom-economic reaction: comprehensive utilization of S-alkylisothiouronium salt in the synthesis of thioethers and guanidinium salts
Source: Royal Society of Chemistry journal article supplement (doi:10.1039/c3ra42503g), 2013-01-01

# **Novel Atom Economic Reaction: Comprehensive Utilization of S-Alkylisothiuronium Salt in the Synthesis of Thioether and Guanidinium Salt**

Pengchao Gao, Penglin Leng, Qi Sun, Xin Wang, Zemei Ge\* and Runtao Li\*

*State key laboratory of natural and biomimetic drugs, School of Pharmaceutical Sciences,  
Peking University, 38 Xueyuan Road, Beijing, 100191, China*

*E-mail: zmge@bjmu.edu.cn; [lirt@mail.bjmu.edu.cn](mailto:lirt@mail.bjmu.edu.cn);*

*Fax: 86 10 82716956; Tel: 86 82801504*

## 1. Experimental part

All reagents were commercially available. The waste free reactions were monitored by thin layer chromatography.  $^1\text{H}$  NMR spectra were recorded on 400MHz Bruker spectrometers with TMS as an internal standard

Compounds **1a-f**<sup>5</sup>, **2a-c**<sup>19</sup>, **3a-c**<sup>10,17</sup>, **4a-r**<sup>19-26</sup>, **5a-e**<sup>15-18</sup>, **6**<sup>28</sup>, **7**<sup>29</sup>, **8**<sup>29</sup>, **9**<sup>30</sup>, **10**<sup>31</sup>, **11**<sup>32</sup> are known. **12** is a new compound. Characterization data ( $^1\text{H}$  NMR,  $^{13}\text{C}$  NMR, MP, ESI-MS) are reported below.

### Typical procedure for the symbiotic reaction

To the mixed solvent (10 mL,  $\text{H}_2\text{O}/\text{EtOH} = 1:1$ ) was added the *S*-alkylisothiuronium salt (4.4 mmol), the amine (4.0 mmol) and the Michael receptor (4.0 mmol), TEA (4.0 mmol). The mixture was stirred at 30 °C for 6 h, then 5 mL  $\text{H}_2\text{O}$  was added and the mixture was extracted with EtOAc (15 mL  $\times$  3). The remaining aqueous layer was concentrated under reduced pressure using a rotary evaporator and the resulting solid was washed with a small amount of ethanol, then recrystallized from hot water to give the corresponding guanidinium salt (**5**). The combined organic layer was dried over anhydrous  $\text{Na}_2\text{SO}_4$  and concentrated under reduced pressure, and the residue was purified by column chromatography (petroleum ether/ethyl acetate) to afford the corresponding thia-Michael addition product (**4**).

#### Methyl 3-(benzylthio)propanoate(**4a**)

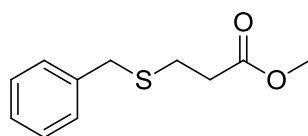

Isolated in 83.4% yield, yellow oil, Lit<sup>19</sup>,  $^1\text{H}$  NMR (400MHz,  $\text{CDCl}_3$ ):  $\delta$  7.25 (m, 5H), 3.66 (s, 2H), 3.61 (s, 3H), 2.61 (t, 2H,  $J = 7.3\text{Hz}$ ), 2.48 (t, 2H,  $J = 7.3\text{Hz}$ ).  $^{13}\text{C}$  NMR (100MHz,  $\text{CDCl}_3$ ):  $\delta$  172.37, 138.05, 128.85, 128.57, 127.11, 51.80, 36.30, 34.29, 26.19

#### 3-(Benzylthio)cyclohexanone(**4b**)

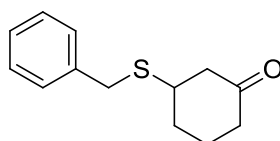

Isolated in 82.3% yield, yellow oil, Lit<sup>19</sup>, <sup>1</sup>H NMR (400MHz, CDCl<sub>3</sub>):  $\delta$  7.18 (m, 5H), 3.67 (s, 2H), 2.85 (m, 1H), 2.57 (m, 1H), 2.26 (m, 3H), 1.99 (m, 2H), 1.61 (m, 2H). <sup>13</sup>C NMR (100MHz, CDCl<sub>3</sub>):  $\delta$  208.68, 137.93, 128.75, 128.62, 127.16, 47.80, 41.97, 40.95, 34.93, 31.28, 24.12

**3-(Benzylthio)propanenitrile(4c)**

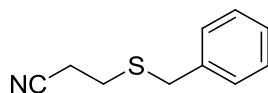

Isolated in 80.1% yield, yellow oil, Lit<sup>19</sup>, <sup>1</sup>H NMR (400MHz, CDCl<sub>3</sub>):  $\delta$  7.24 (m, 5H), 3.69 (s, 2H), 2.54 (t, 2H,  $J = 7.2$ Hz), 2.38 (t, 2H,  $J = 7.2$ Hz). <sup>13</sup>C NMR (100MHz, CDCl<sub>3</sub>):  $\delta$  137.43, 128.93, 128.79, 127.48, 118.50, 36.30, 26.64, 18.61

**Methyl 3-(methylthio)propanoate(4d)**

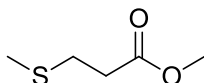

Isolated in 61.8% yield, pale yellow oil, Lit<sup>19</sup>, <sup>1</sup>H NMR (400MHz, CDCl<sub>3</sub>):  $\delta$  3.63 (s, 3H), 2.70 (t, 2H,  $J = 7.4$ Hz), 2.56 (t, 2H,  $J = 7.4$ Hz), 2.05 (s, 3H). <sup>13</sup>C NMR (100MHz, CDCl<sub>3</sub>):  $\delta$  171.38, 50.75, 33.22, 28.06, 14.46

**3-(Methylthio)cyclohexanone(4e)**

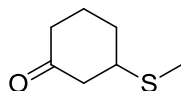

Isolated in 72.6% yield, yellow oil, Lit<sup>19</sup>, <sup>1</sup>H NMR (400MHz, CDCl<sub>3</sub>):  $\delta$  2.90-2.93 (m, 1H),  $\delta$  2.61-2.66 (m, 1H),  $\delta$  2.26-2.34 (m, 3H),  $\delta$  2.05-2.10 (m, 5H),  $\delta$  1.63-1.68 (m, 2H). <sup>13</sup>C NMR (100MHz, CDCl<sub>3</sub>):  $\delta$  208.73, 47.50, 44.12, 40.86, 30.90, 24.05, 13.48

**3-(Methylthio)propanenitrile(4f)**

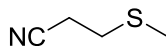

Isolated in 58.9% yield, colorless oil, Lit<sup>19</sup>, <sup>1</sup>H NMR (400MHz, CDCl<sub>3</sub>):  $\delta$  2.71 (t, 2H,  $J = 7.5$ Hz), 2.60 (t, 2H,  $J = 7.5$ Hz), 2.13 (s, 3H). <sup>13</sup>C NMR (100MHz, CDCl<sub>3</sub>):  $\delta$  117.39, 28.65, 17.43, 14.58

**Methyl 3-(ethylthio)propanoate(4g)**

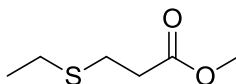

Isolated in 68.5% yield, pale yellow oil, Lit<sup>20</sup>, <sup>1</sup>H NMR (400MHz, CDCl<sub>3</sub>):  $\delta$  3.63 (s, 3H), 2.71-2.75 (m, 2H), 2.48-2.55 (m, 4H), 1.17-1.21 (m, 3H). <sup>13</sup>C NMR (100MHz, CDCl<sub>3</sub>):  $\delta$  172.45, 51.75, 34.65, 26.49, 25.94, 14.64

**3-(Ethylthio)cyclohexanone(4h)**

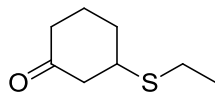

Isolated in 81.5% yield, brown oil, Lit<sup>21</sup>, <sup>1</sup>H NMR (400MHz, CDCl<sub>3</sub>):  $\delta$  3.03 (m, 1H), 2.61-2.65 (m, 1H), 2.50 (q, 2H,  $J$  = 7.4Hz), 2.28-2.30 (m, 3H), 2.06-2.09 (m, 2H), 1.63-1.68 (m, 2H), 1.19 (t, 3H,  $J$  = 7.4Hz). <sup>13</sup>C NMR (100MHz, CDCl<sub>3</sub>):  $\delta$  207.93, 47.14, 41.34, 39.96, 30.55, 23.40, 23.23, 13.78

**3-(Ethylthio)propanenitrile(4i)**

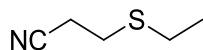

Isolated in 77.1% yield, colorless oil, Lit<sup>22</sup>, <sup>1</sup>H NMR (400MHz, CDCl<sub>3</sub>):  $\delta$  2.74 (t, 2H,  $J$  = 7.1Hz), 2.57 (m, 4H), 1.22 (t, 3H,  $J$  = 7.4Hz). <sup>13</sup>C NMR (100MHz, CDCl<sub>3</sub>):  $\delta$  118.52, 27.09, 26.00, 18.86, 14.56

**Methyl 3-(cyclopentylthio)propanoate(4j)**

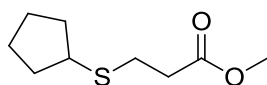

Isolated in 68.1% yield, pale yellow oil, Lit<sup>19</sup>, <sup>1</sup>H NMR (400MHz, CDCl<sub>3</sub>):  $\delta$  3.72 (s, 3H), 2.81 (t, 2H,  $J$  = 7.4Hz), 2.63 (t, 2H,  $J$  = 7.4Hz), 2.55 (m, 1H), 1.63 (m, 2H), 1.36(m, 6H). <sup>13</sup>C NMR (100MHz, CDCl<sub>3</sub>):  $\delta$  171.40, 59.57, 50.70, 33.71, 28.24, 25.94, 21.30

**3-(Cyclopentylthio)cyclohexanone(4k)**

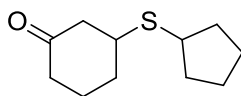

Isolated in 75.7% yield, yellow oil, Lit<sup>19</sup>, <sup>1</sup>H NMR(400MHz,CDCl<sub>3</sub>):  $\delta$  2.98 (m, 1H), 2.60-2.65 (m, 1H), 2.45 (m, 2H), 2.27-2.33 (m, 3H), 2.04-2.08 (m, 2H), 1.62-1.67 (m, 2H), 1.49-1.57 (m, 2H), 1.24-1.29 (m, 3H), 0.82 (t, 2H,  $J$  = 7.0Hz). <sup>13</sup>C NMR (100MHz, CDCl<sub>3</sub>):  $\delta$  208.76, 48.16, 42.68, 40.90, 31.57, 31.04, 30.43, 24.18, 22.22

**3-(Cyclopentylthio)propanenitrile(4l)**

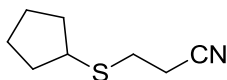

Isolated in 68.1% yield, pale yellow oil, Lit<sup>19</sup>, <sup>1</sup>H NMR (400MHz, CDCl<sub>3</sub>):  $\delta$  2.71 (t, 2H,  $J$  = 7.2Hz), 2.57 (t, 2H,  $J$  = 7.2Hz), 2.52 (m, 1H), 1.53 (m, 2H), 1.28(m, 6H). <sup>13</sup>C NMR (100MHz, CDCl<sub>3</sub>):  $\delta$  118.45, 30.90, 29.11, 27.59, 22.24, 18.91

**Methyl 3-(allylthio)propanoate(4m)**

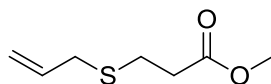

Isolated in 71.2% yield, pale yellow oil, Lit<sup>23</sup>, <sup>1</sup>H NMR (400MHz, CDCl<sub>3</sub>):  $\delta$  5.61-5.80 (m, 1H), 5.05 (d, 2H,  $J$  = 18.7Hz), 3.62 (s, 3H), 3.08 (d, 2H,  $J$  = 6.9Hz), 2.66 (t, 2H,  $J$  = 7.2Hz), 2.52 (t, 2H,  $J$  = 7.2Hz). <sup>13</sup>CNMR (100MHz, CDCl<sub>3</sub>):  $\delta$  172.27, 134.13, 117.18, 51.69, 34.76, 34.37, 25.53

**3-(Allylthio)cyclohexanone(4n)**

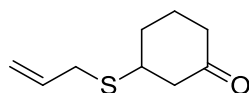

Isolated in 82.8% yield, pale yellow oil, Lit<sup>23</sup>, <sup>1</sup>H NMR (400MHz, CDCl<sub>3</sub>):  $\delta$  5.91-5.64 (m, 1H), 5.11 (d, 2H,  $J$  = 13.9Hz), 3.19 (d, 2H,  $J$  = 7.1Hz), 3.09-2.95 (m, 1H), 2.68 (dd, 1H,  $J$  = 14.3, 4.5Hz), 2.45-2.25 (m, 3H), 2.18-2.01 (m, 2H), 1.78-1.60 (m, 2H). <sup>13</sup>C NMR (100MHz, CDCl<sub>3</sub>):  $\delta$  208.86, 134.23, 117.24, 47.92, 41.40, 40.97, 33.58, 31.36, 24.21

**3-(Allylthio)propanenitrile(4o)**

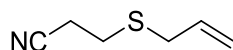

Isolated in 66.5% yield, pale red oil, Lit<sup>24</sup>, <sup>1</sup>H NMR (400MHz, CDCl<sub>3</sub>):  $\delta$  5.72 (m, 1H), 5.09 (d, 2H,  $J$  = 12.8Hz), 3.15 (d, 2H,  $J$  = 7.2Hz), 2.66 (t, 2H,  $J$  = 7.0Hz), 2.56 (t, 2H,  $J$  = 7.0Hz). <sup>13</sup>C NMR (100MHz, CDCl<sub>3</sub>):  $\delta$  133.63, 118.41, 118.01, 34.75, 25.86, 18.66

**Methyl 3-(butylthio)propanoate(4p)**

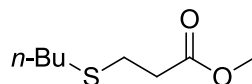

Isolated in 78.8% yield, pale yellow oil, Lit<sup>25</sup>, <sup>1</sup>H NMR(400MHz,CDCl<sub>3</sub>):  $\delta$  3.67 (s, 3H), 2.75 (t, 2H,  $J$  = 7.4Hz), 2.58 (t, 2H,  $J$  = 7.3Hz), 2.50 (t, 2H,  $J$  = 7.3Hz), 1.54 (m, 2H), 1.37 (m, 2H), 0.89 (s, 3H,  $J$  = 7.4Hz). <sup>13</sup>C NMR (100MHz, CDCl<sub>3</sub>):  $\delta$  172.37, 51.66, 54.69, 31.79, 31.59, 36.92, 21.90, 13.59

**3-(Butylthio)cyclohexanone(4q)**

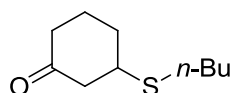

Isolated in 72.4% yield, yellow oil, Lit<sup>25</sup>, <sup>1</sup>H NMR(400MHz,CDCl<sub>3</sub>):  $\delta$  2.62-2.65 (m, 1H), 2.48 (m, 3H), 2.28-2.31 (m, 3H), 2.07-2.09 (m, 2H), 1.64-1.67 (m, 2H), 1.48 (m, 2H), 1.32 (m, 2H), 0.84 (t, 3H,  $J$  = 7.1Hz). <sup>13</sup>C NMR (100MHz, CDCl<sub>3</sub>):  $\delta$  207.91, 47.25, 41.76, 39.95, 30.78, 30.66, 29.21, 23.26, 21.03, 12.64

### 3-(Butylthio)propanenitrile(4r)

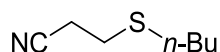

Isolated in 63.5% yield, yellow oil, Lit<sup>26</sup>, <sup>1</sup>H NMR (400MHz, CDCl<sub>3</sub>):  $\delta$  2.71 (t, 2H,  $J$  = 6.9Hz), 2.51-2.58 (dt, 4H,  $J$  = 14.6Hz, 7.2Hz), 1.51 (m, 2H), 1.36 (m, 2H), 0.86 (t, 3H,  $J$  = 7.2Hz). <sup>13</sup>C NMR (100MHz, CDCl<sub>3</sub>):  $\delta$  117.38, 30.96, 30.49, 26.61, 20.86, 17.91, 12.60

### 1-Benzylguanidine hydrochloride (5a)

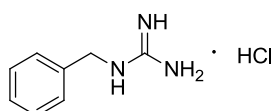

Mp 175-178 °C, Lit<sup>16,18</sup>, Mp 173-174°C, <sup>1</sup>H NMR (400MHz, D<sub>2</sub>O):  $\delta$  7.43 (m, 5H), 4.43 (s, 2H). ES ([M+H]<sup>+</sup>) calculated: 150.24(100)

### 1-Benzylguanidine Half Sulfate(5b)

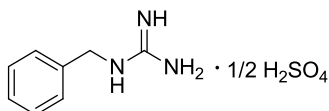

Mp 204-205 °C, Lit<sup>15</sup>, Mp 208-209 °C, <sup>1</sup>H NMR (400MHz, D<sub>2</sub>O):  $\delta$  7.38 (m, 5H), 4.42 (s, 2H). ES ([M+H]<sup>+</sup>) calculated: 150.24(100)

### 1-Benzylguanidine Hydrobromate(5c)

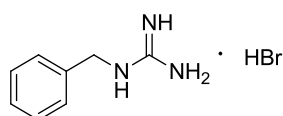

Mp 110-113°C, <sup>1</sup>H NMR (400MHz, D<sub>2</sub>O):  $\delta$  7.42 (m, 5H), 4.43 (s, 2H). ES ([M+H]<sup>+</sup>) calculated: 150.24(100)

### 2-Guanidinoacetic Hydrobromate (5d)

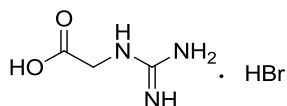

Carbonized at 284 °C, Lit<sup>18</sup> Carbonized at 280-284°C, <sup>1</sup>H NMR (400MHz, D<sub>2</sub>O) :  $\delta$  3.69 (s, 2H).  
ES([M+H]<sup>+</sup>) calculated: 118.07(100)

#### Ismelin Half Sulfate (5e)

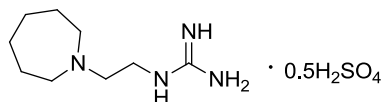

Mp 270-271 °C, Lit<sup>17</sup>, Mp 276-281°C. <sup>1</sup>H NMR (400MHz, D<sub>2</sub>O) :  $\delta$  3.36 (t, 2H, *J* = 6.4Hz), 3.31 (m, 6H), 1.80 (s, 4H), 1.60 (s, 4H). <sup>13</sup>C NMR (100MHz, D<sub>2</sub>O):  $\delta$  156.98, 55.10, 54.66, 36.28, 25.91, 22.99.  
ES([M+H]<sup>+</sup>) calculated: 185.26 (100)

#### Ethyl 3-(4-tert-butoxycarbonylaminomethylphenyl) acrylate (10)

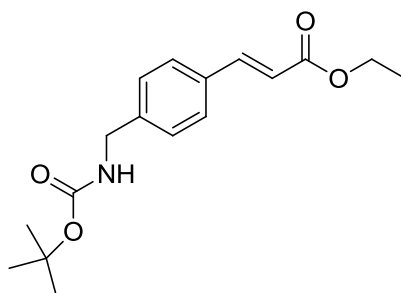

Isolated in 20.5% overall yield as a brown oil, Lit<sup>31</sup>, <sup>1</sup>H NMR (400MHz, CDCl<sub>3</sub>)  $\delta$  7.59 (d, 1H, *J* = 16.0Hz), 7.40 (d, 2H, *J* = 8.2Hz), 7.22 (d, 2H, *J* = 8.2Hz), 6.34 (d, 2H, *J* = 16.0Hz), 4.71 (s, 2H), 4.19 (q, 2H, *J* = 7.1Hz), 1.38 (s, 9H), 1.26 (t, 3H, *J* = 7.1Hz). <sup>13</sup>C NMR (100MHz, CDCl<sub>3</sub>):  $\delta$  166.99, 151.49, 143.21, 139.91, 132.33, 127.07, 126.66, 117.01, 81.68, 59.43, 48.22, 26.99, 13.31

#### Ethyl 3-benzylthio-3-(4-guanidinomethylphenyl) propanoate Hydrochloride (12)

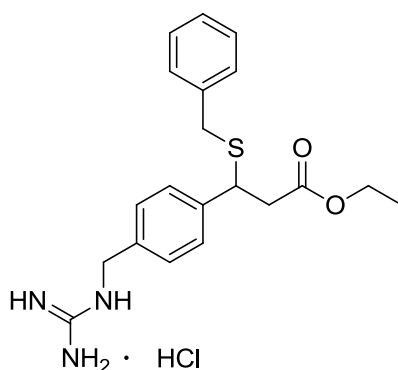

Isolated by column chromatography ( Ethyl Acetate/MeOH = 5:1) in 42.1% yield. Yellow solid, Mp 176.1-179.6°C,  $^1\text{H}$  NMR (400MHz,  $\text{CD}_3\text{OD}$ )  $\delta$  7.34 (m, 9H), 4.33 (s, 1H), 4.16 (q, 2H,  $J = 7.1\text{Hz}$ ), 3.91 (m, 2H), 2.74 (m, 2H), 1.22 (t, 3H,  $J = 7.1\text{Hz}$ ).  $^{13}\text{C}$  NMR (100MHz,  $\text{DMSO}-d_6$ ):  $\delta$  170.43, 163.47, 137.78, 129.84, 129.55, 129.26, 128.87, 128.23, 127.77, 127.41, 60.54, 44.64, 42.25, 42.07, 35.31, 14.67, HR ESI MS  $m/z$  calcd for  $\text{C}_{20}\text{H}_{25}\text{N}_3\text{O}_2\text{S}$ ,  $([\text{M}+\text{H}]^+)$  372.17451.

## 2. Spectra of compounds

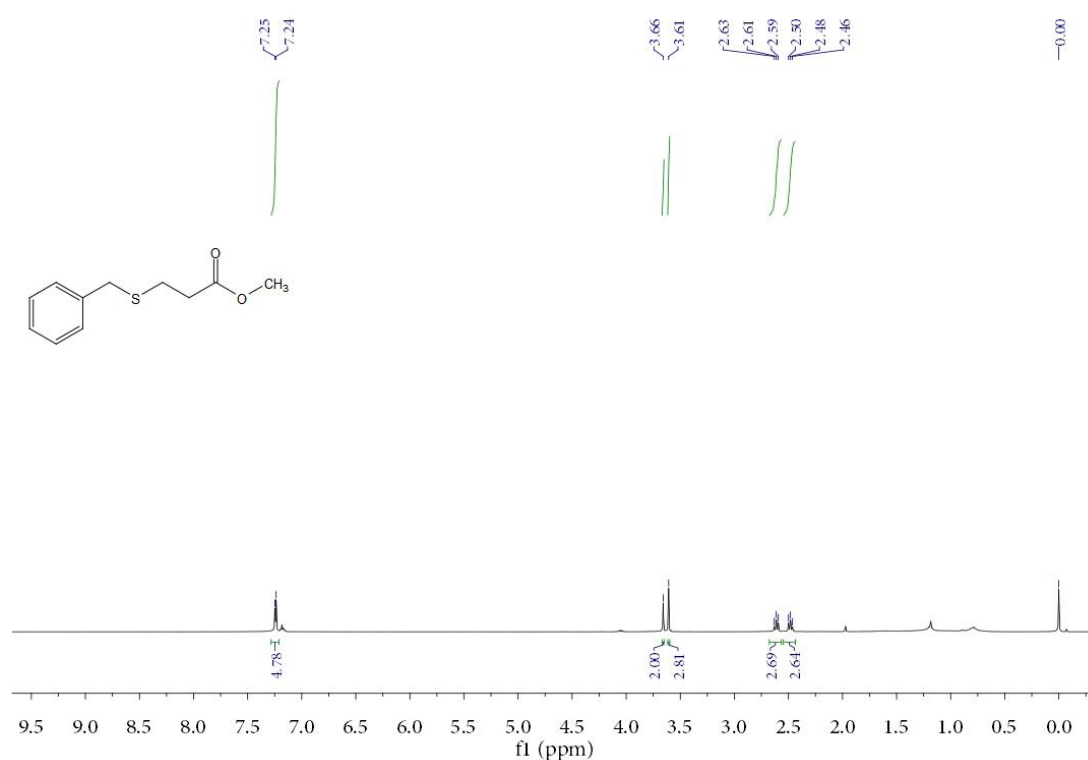

$^1\text{H}$  NMR(400MHz,  $\text{CDCl}_3$ ) of Compound **4a**



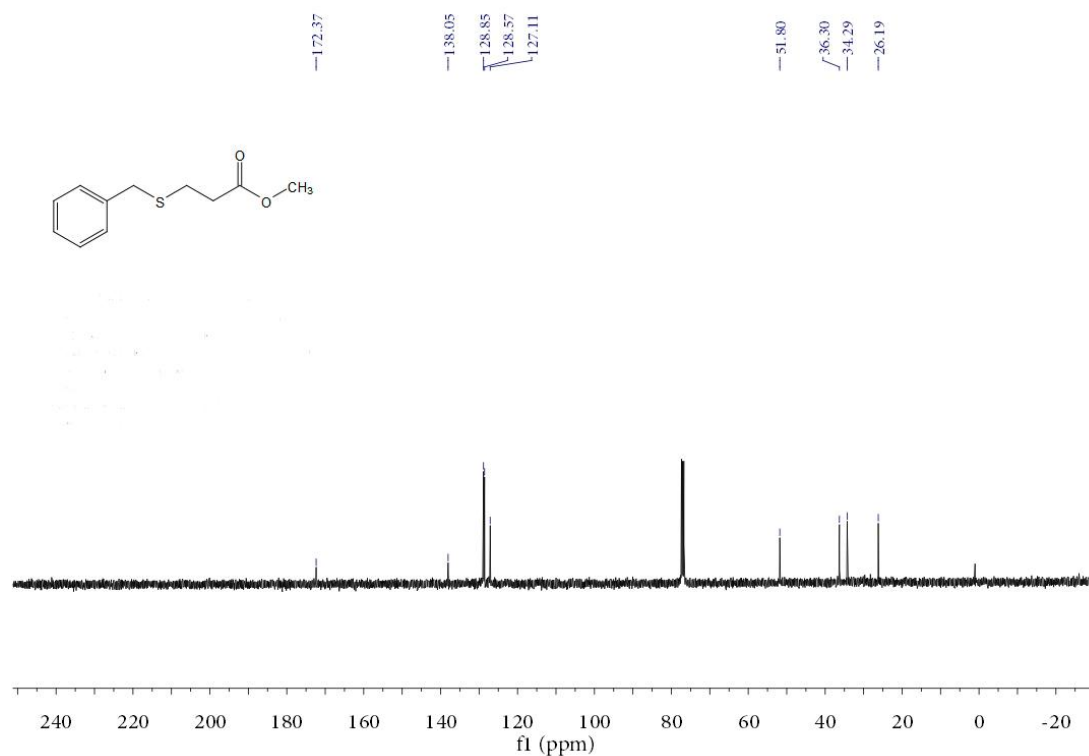

$^{13}\text{C}$  NMR(100MHz,  $\text{CDCl}_3$ ) of Compound **4a**

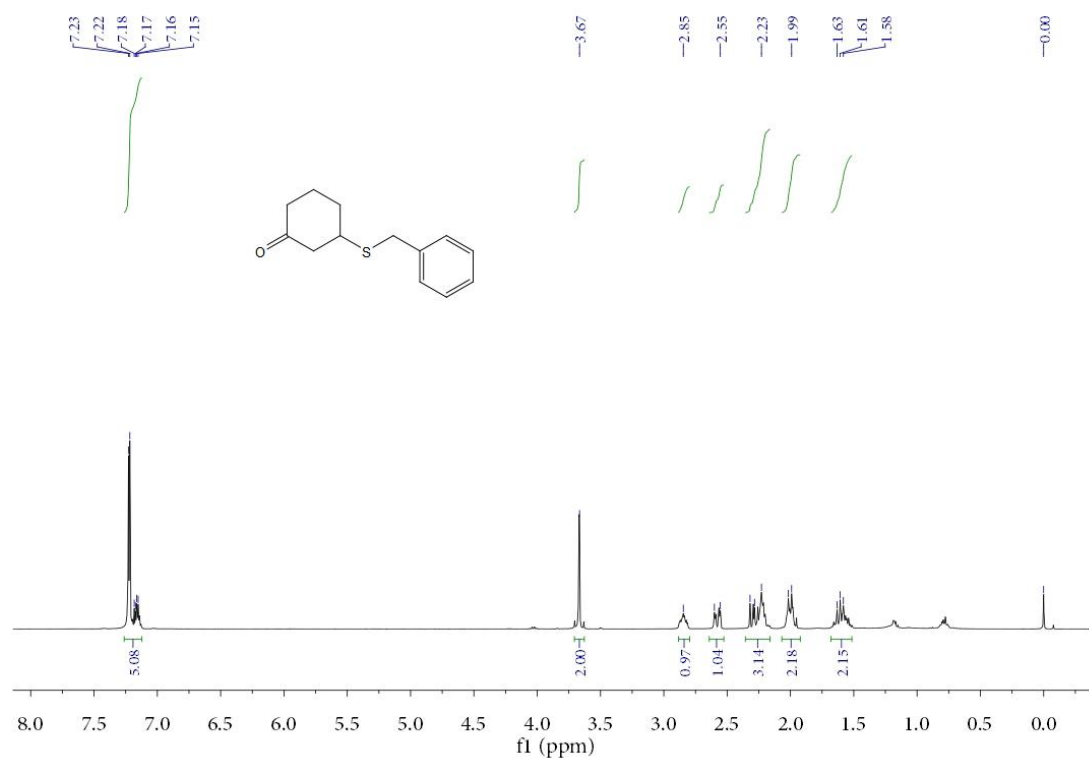

$^1\text{H}$  NMR(400MHz,  $\text{CDCl}_3$ ) of Compound **4b**

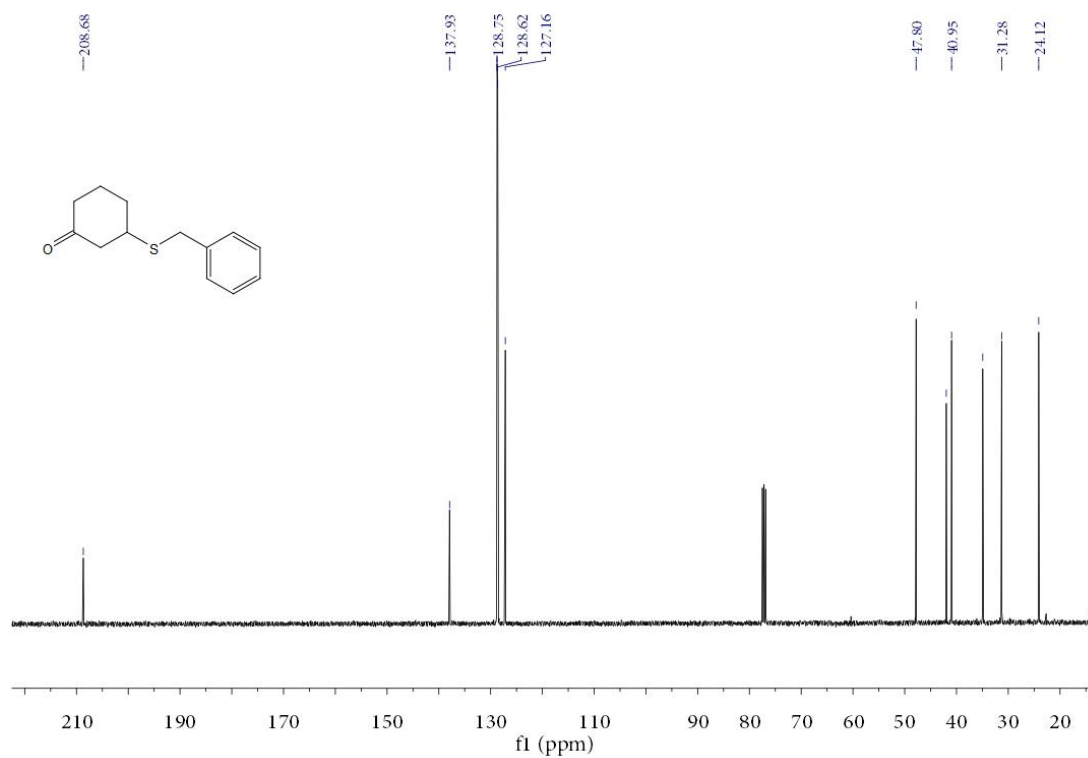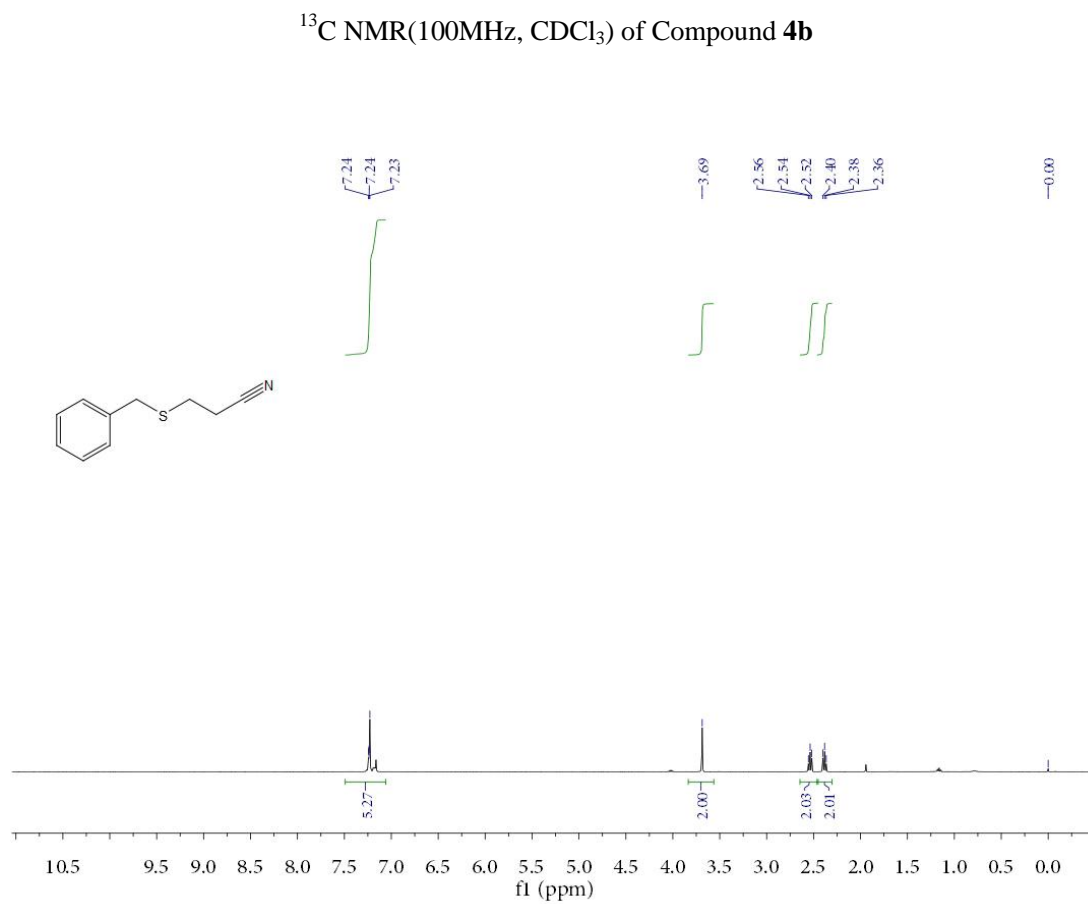

$^1\text{H}$  NMR (400MHz,  $\text{CDCl}_3$ ) of Compound **4c**

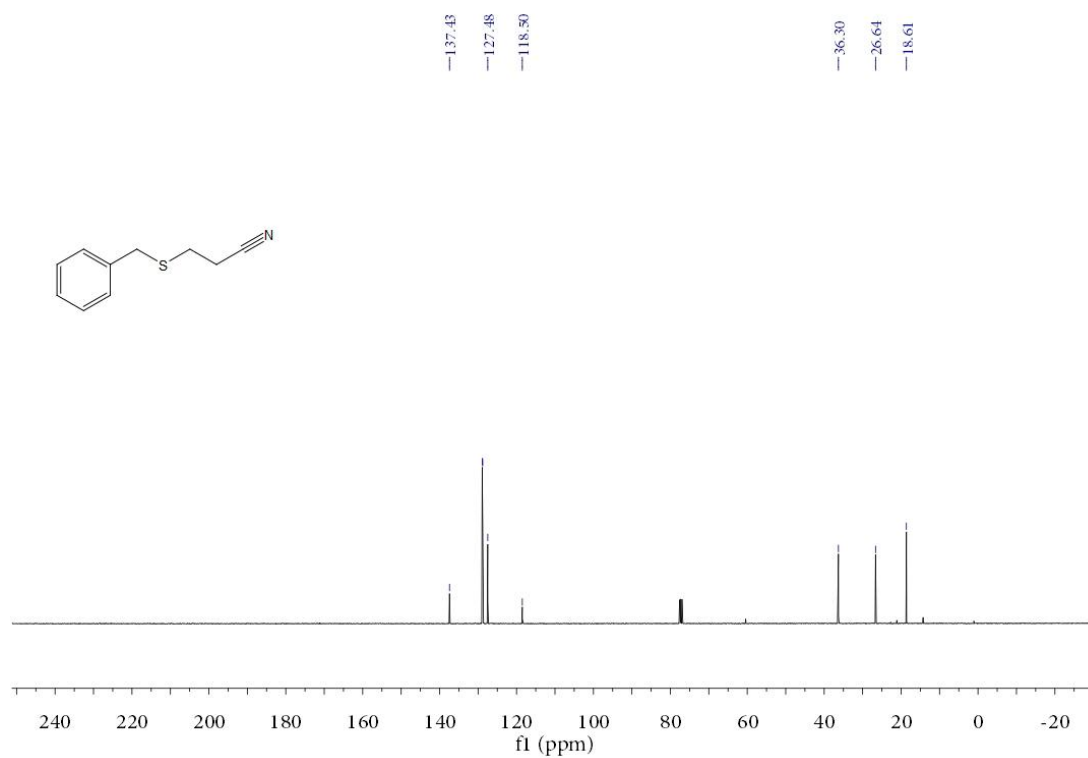

$^{13}\text{C}$  NMR(100MHz,  $\text{CDCl}_3$ ) of Compound **4c**

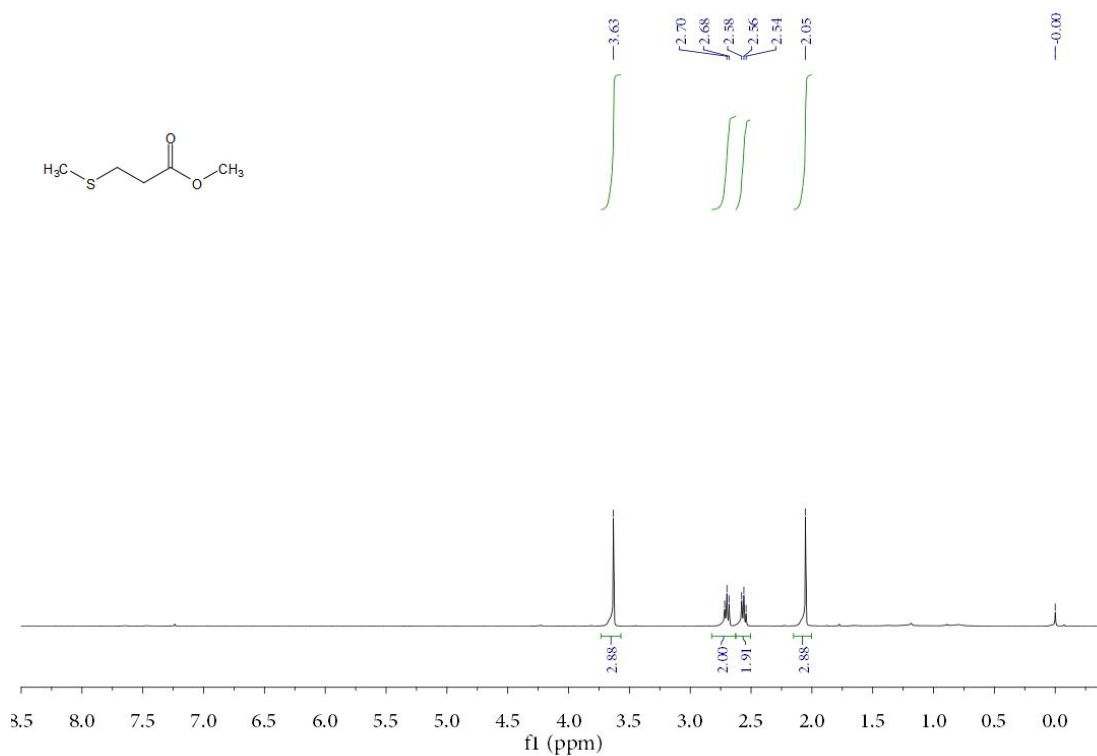

$^1\text{H}$  NMR(400MHz,  $\text{CDCl}_3$ ) of Compound **4d**

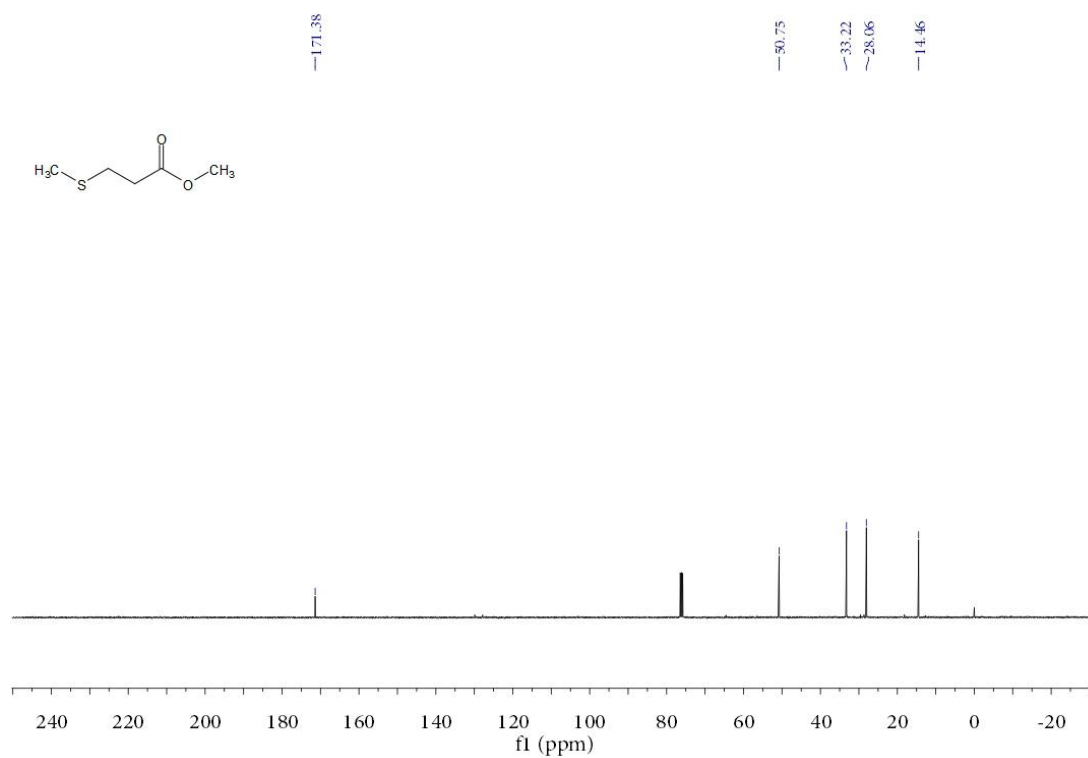

<sup>13</sup>C NMR(100MHz, CDCl<sub>3</sub>) of Compound **4d**

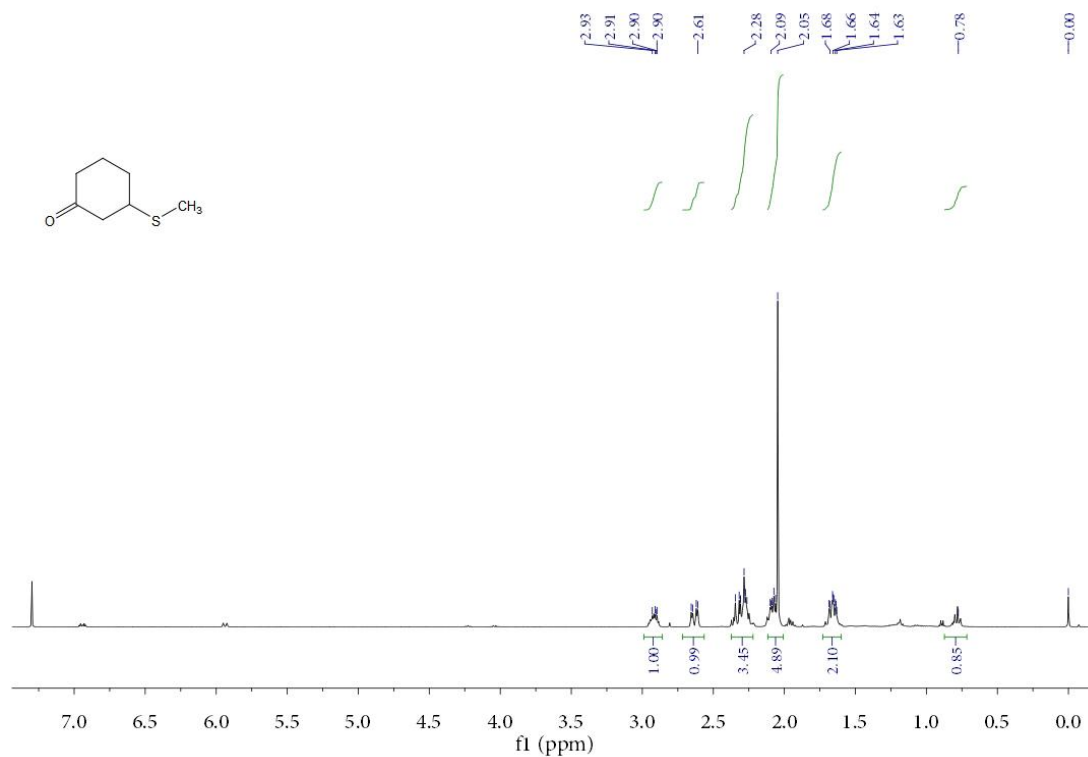

<sup>1</sup>H NMR(400MHz, CDCl<sub>3</sub>) of Compound **4e**

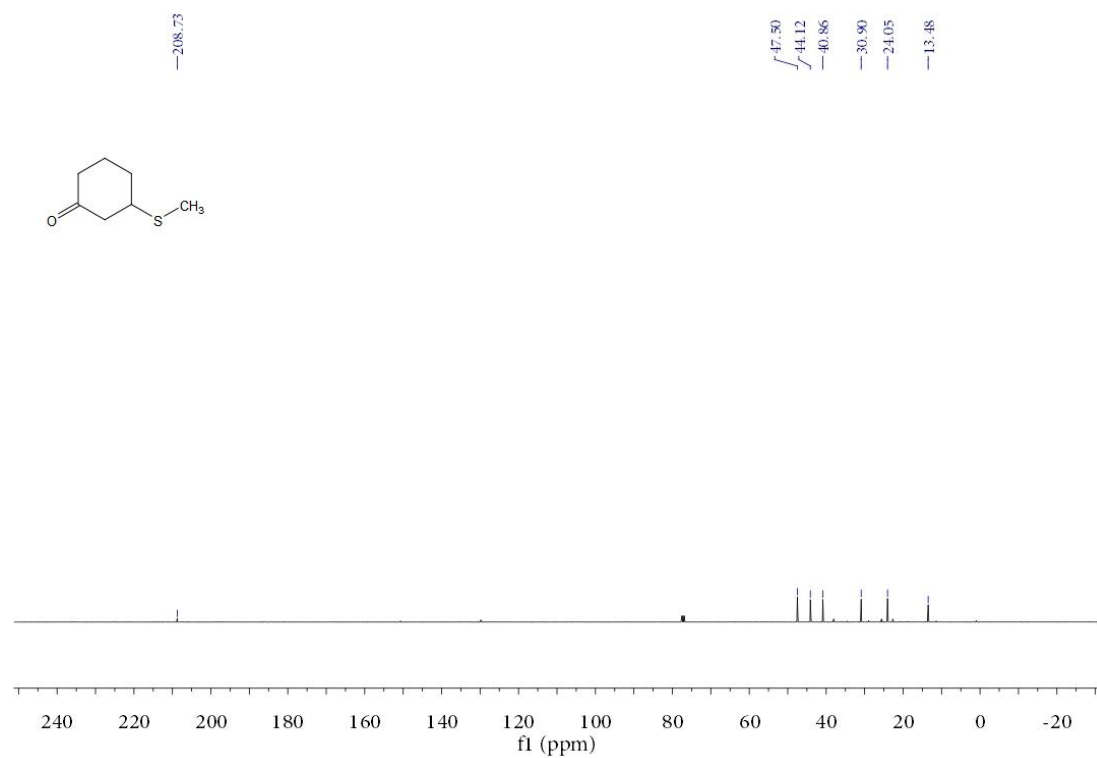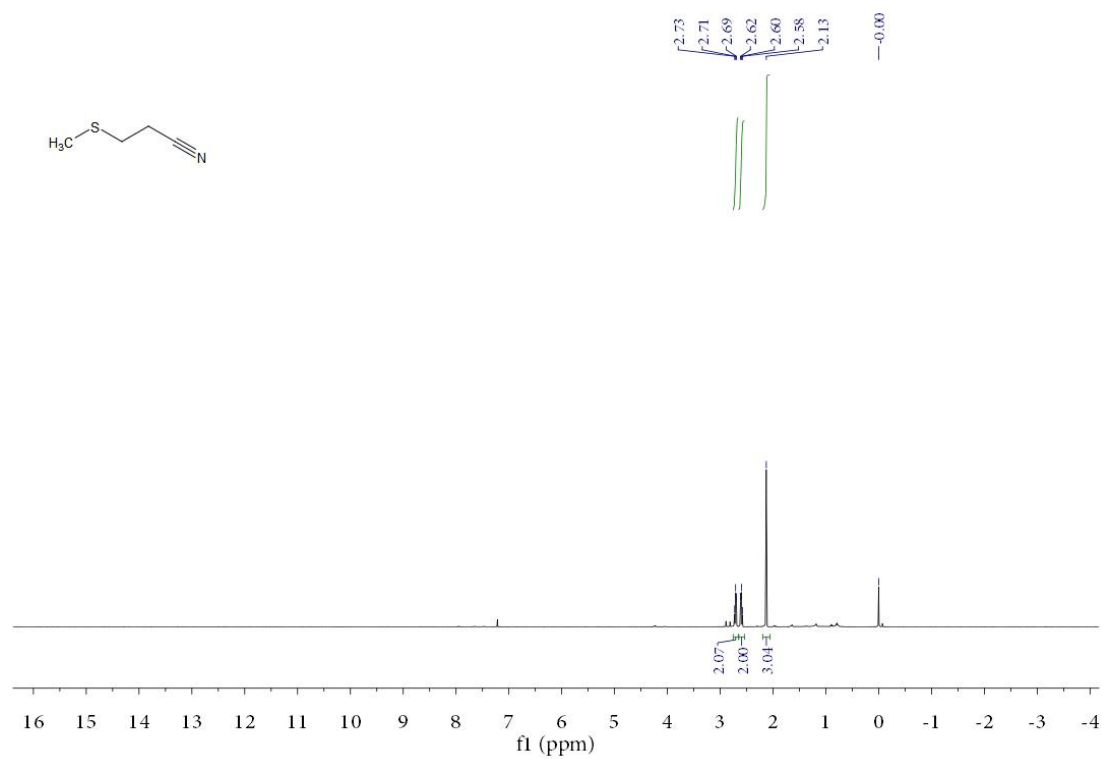

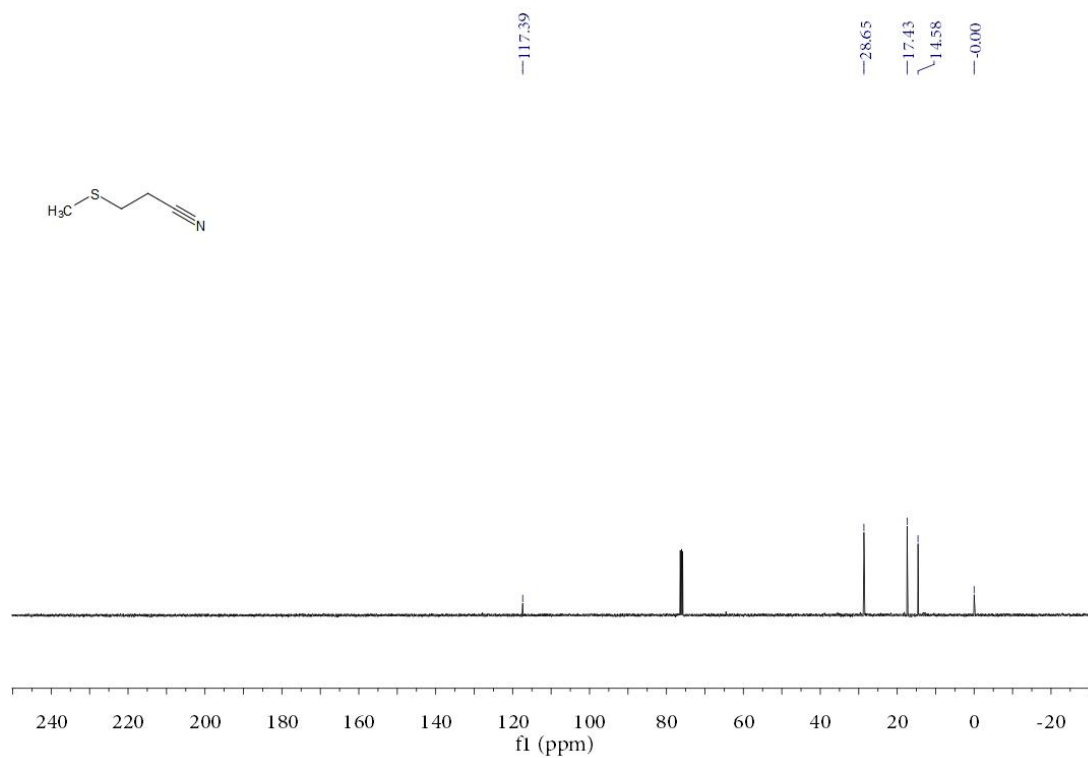

<sup>13</sup>C NMR(100MHz, CDCl<sub>3</sub>) of Compound **4f**

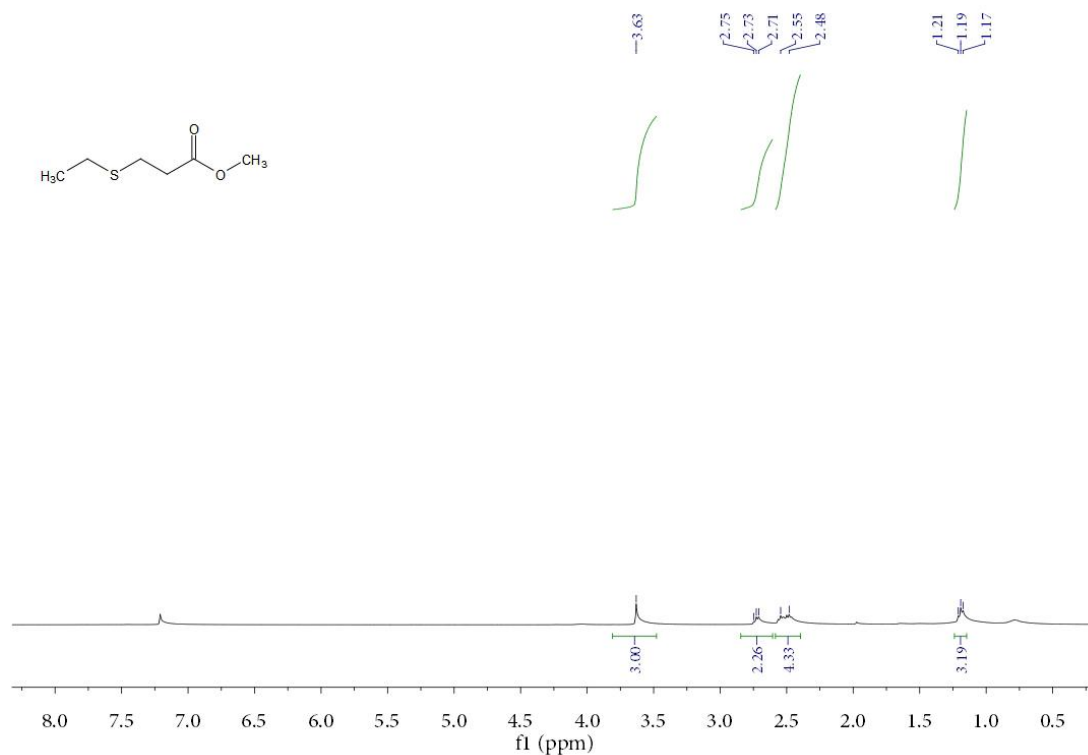

<sup>1</sup>H NMR(400MHz, CDCl<sub>3</sub>) of Compound **4g**

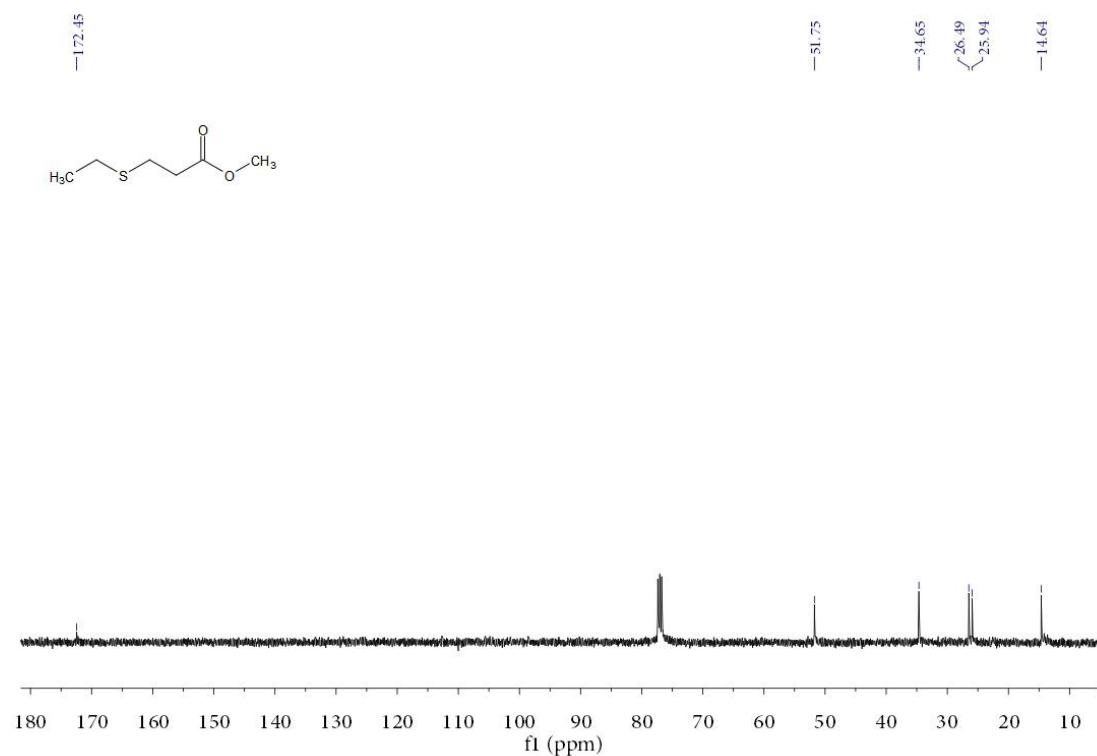

$^{13}\text{C}$  NMR(100MHz,  $\text{CDCl}_3$ ) of Compound **4g**

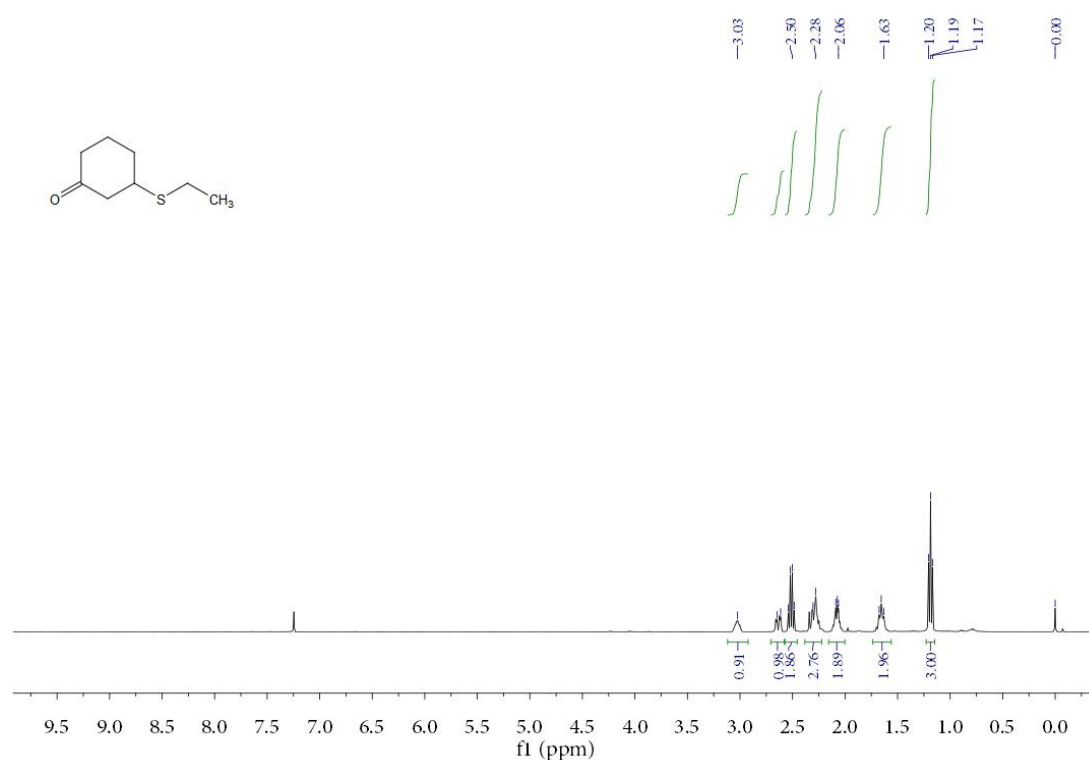

$^1\text{H}$  NMR(400MHz,  $\text{CDCl}_3$ ) of Compound **4h**

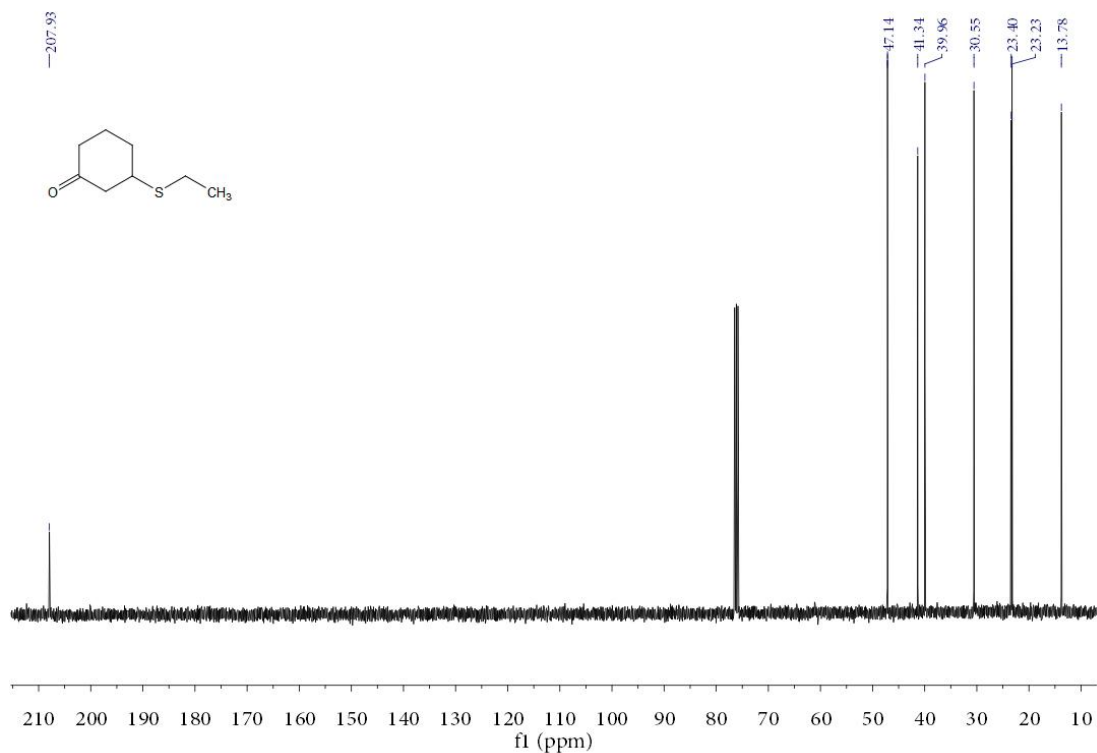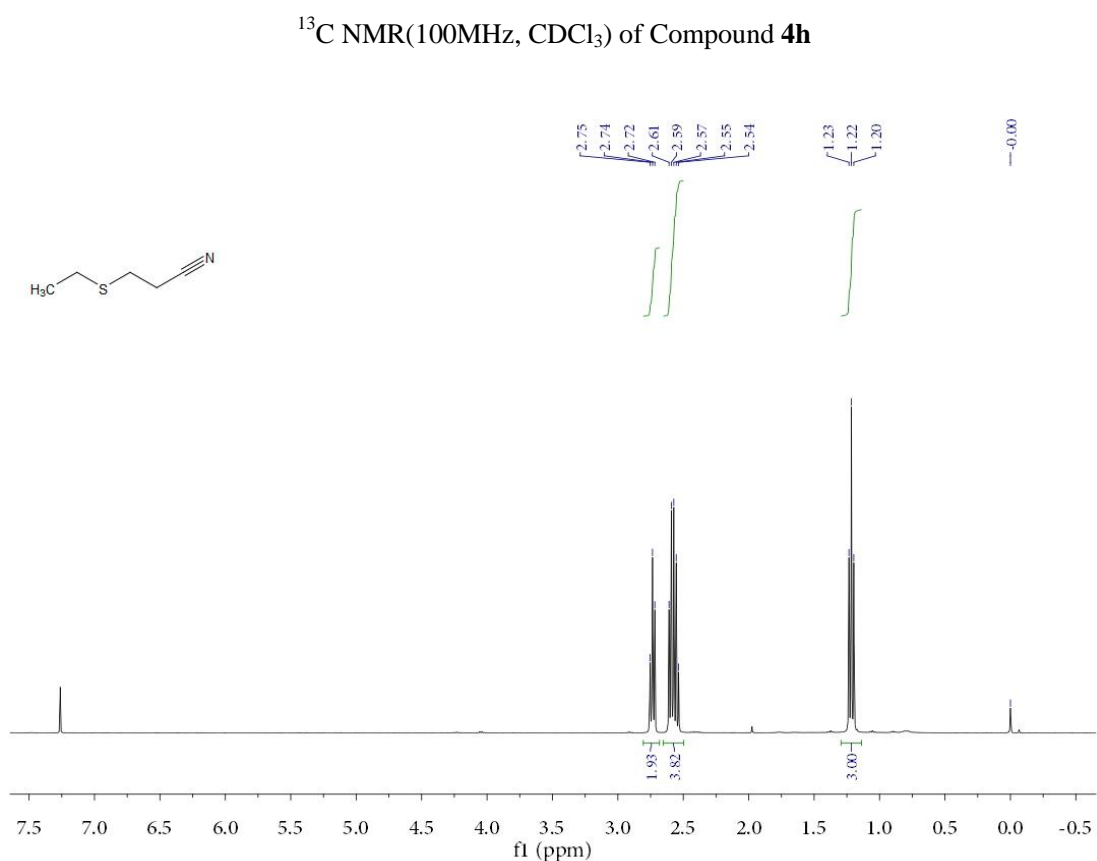



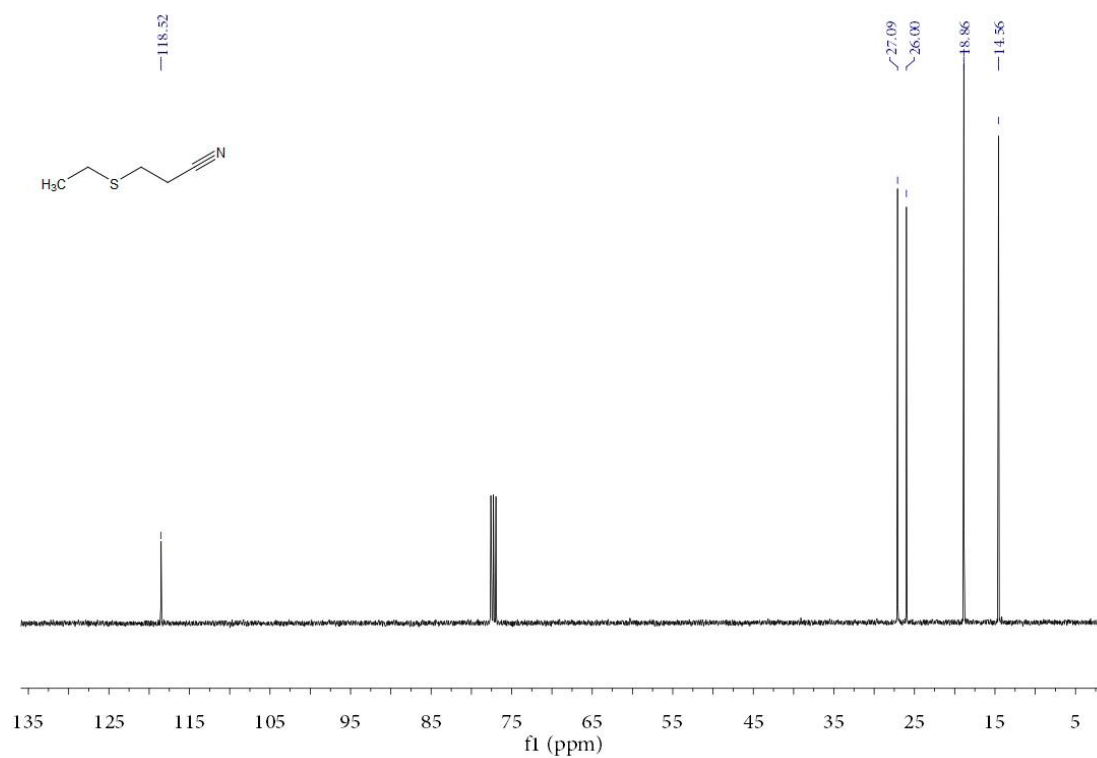

$^{13}\text{C}$  NMR (100 MHz,  $\text{CDCl}_3$ ) of Compound 4i

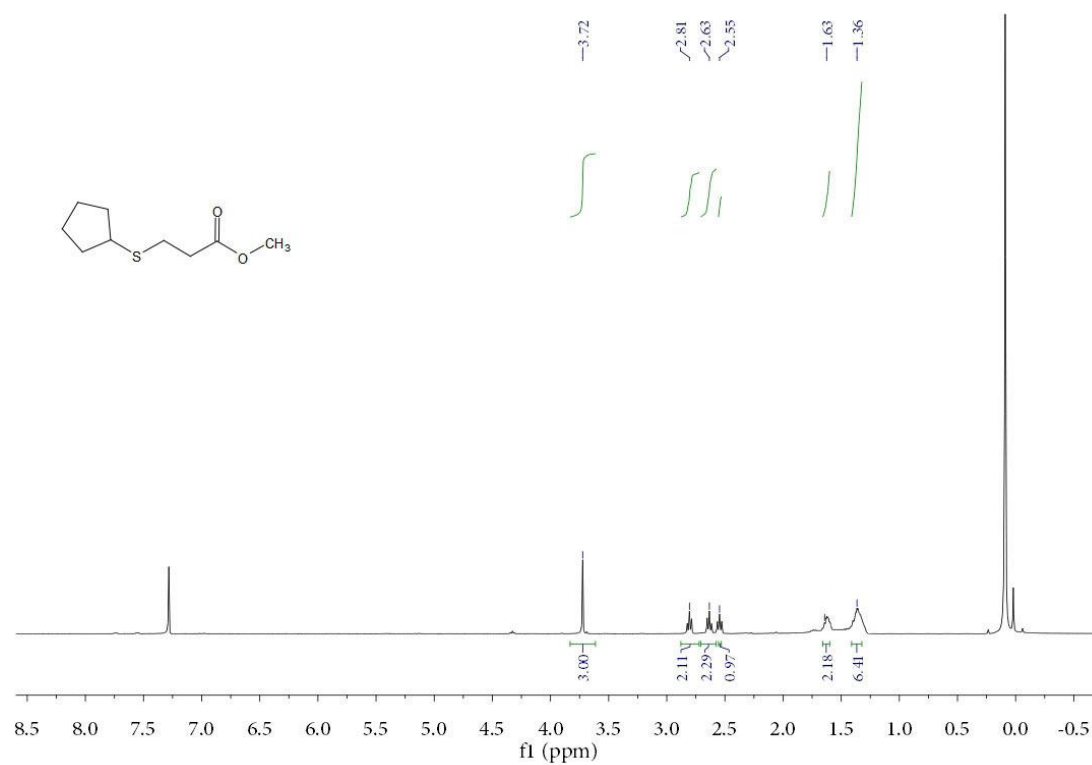

$^1\text{H}$  NMR (400 MHz,  $\text{CDCl}_3$ ) of Compound 4j

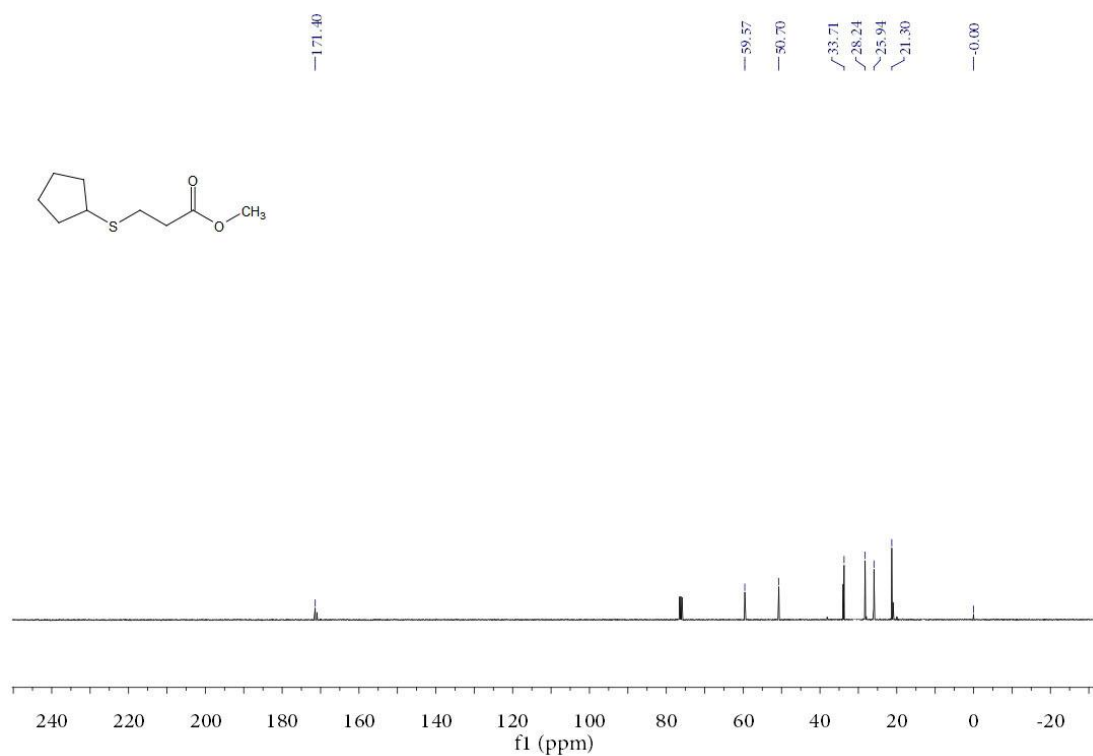

$^{13}\text{C}$  NMR(100MHz,  $\text{CDCl}_3$ ) of Compound **4j**

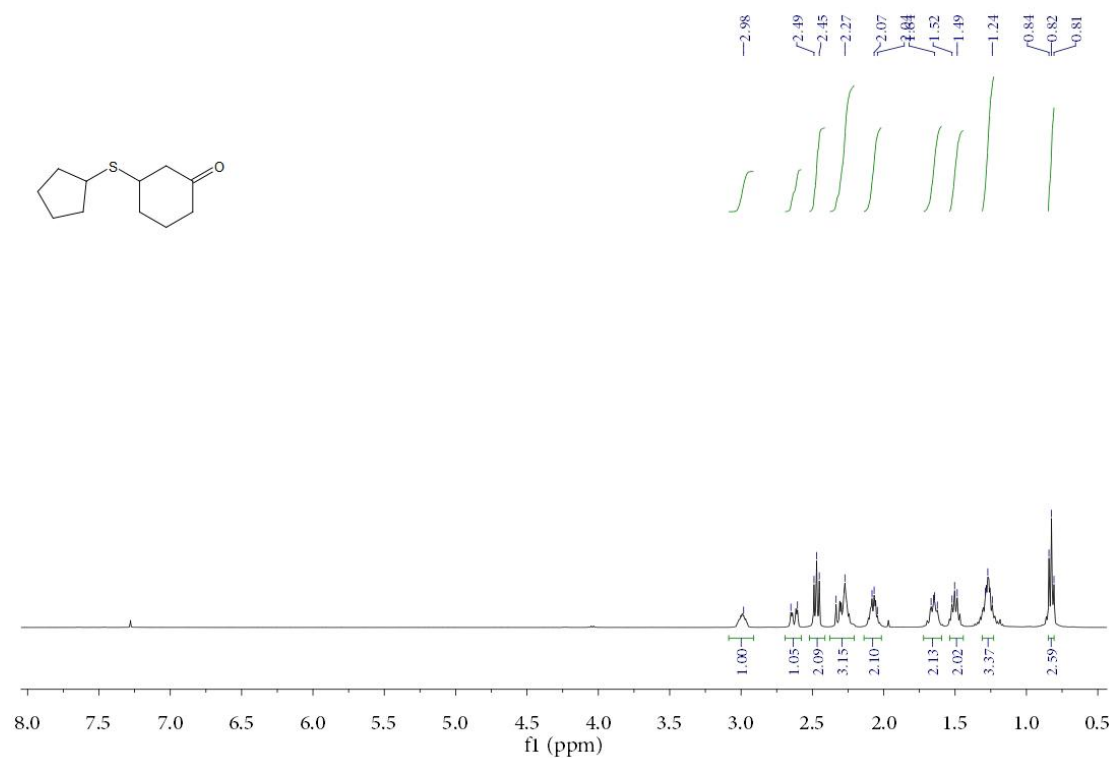

$^1\text{H}$  NMR(400MHz,  $\text{CDCl}_3$ ) of Compound **4k**

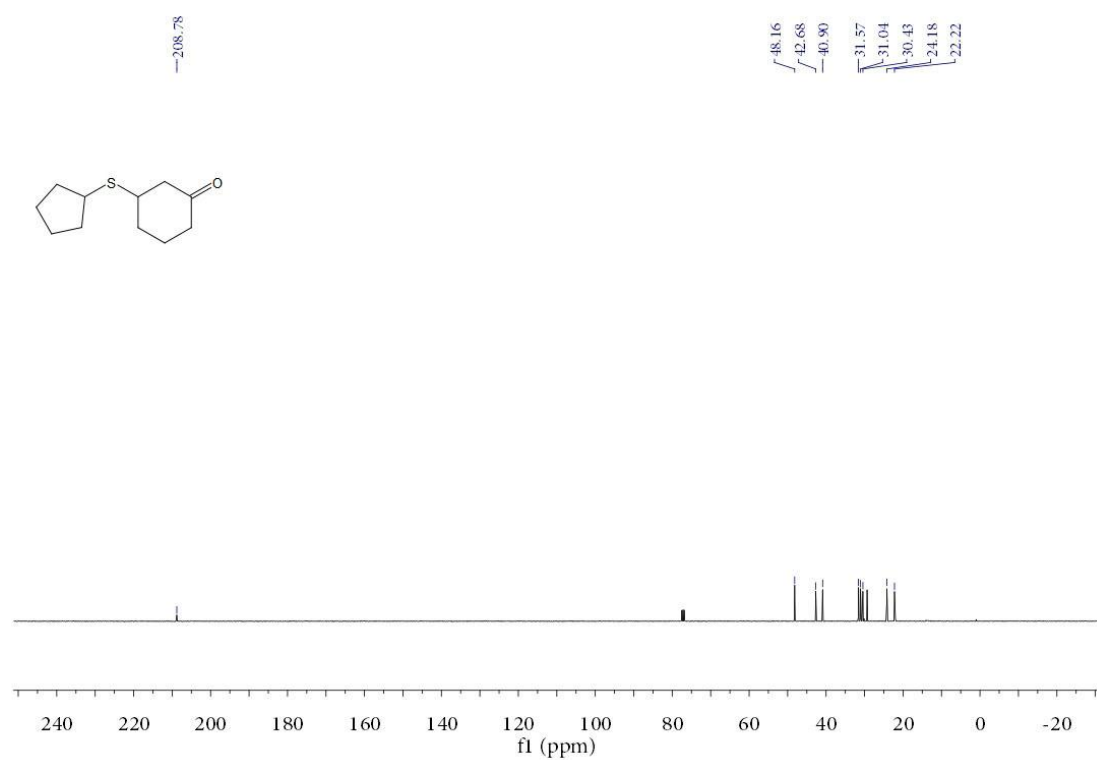

<sup>13</sup>C NMR(100MHz, CDCl<sub>3</sub>) of Compound **4k**

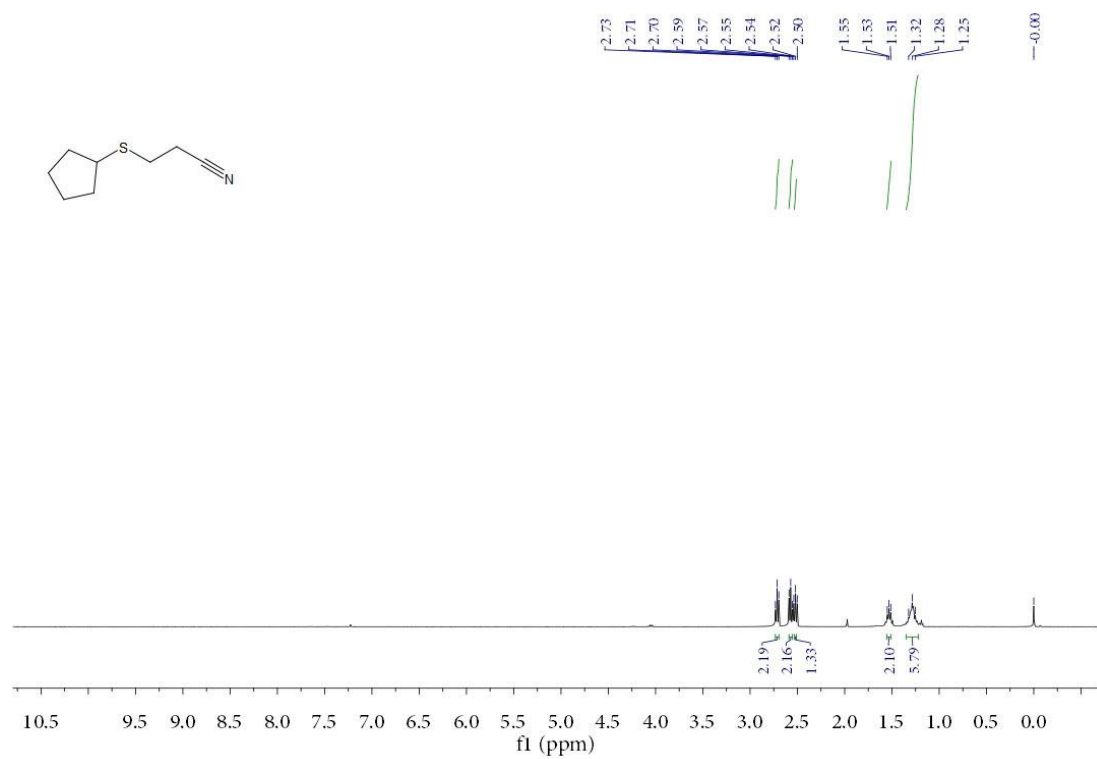

<sup>1</sup>H NMR(400MHz, CDCl<sub>3</sub>) of Compound **4l**

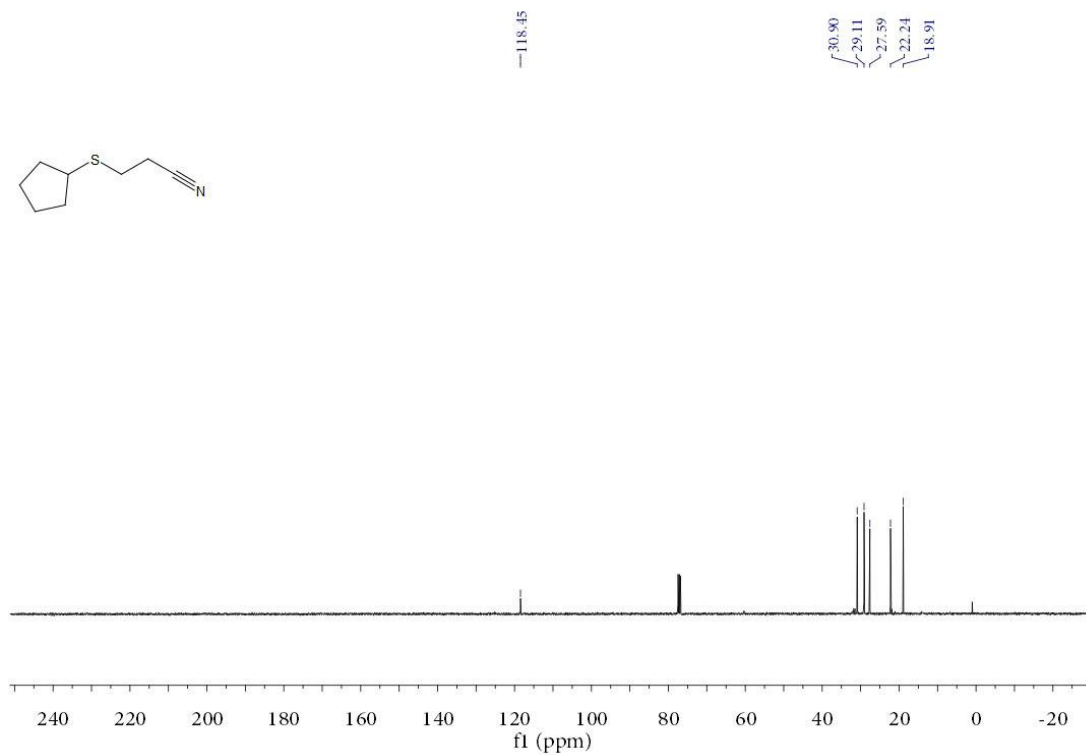

$^{13}\text{C}$  NMR (100 MHz,  $\text{CDCl}_3$ ) of Compound **4l**

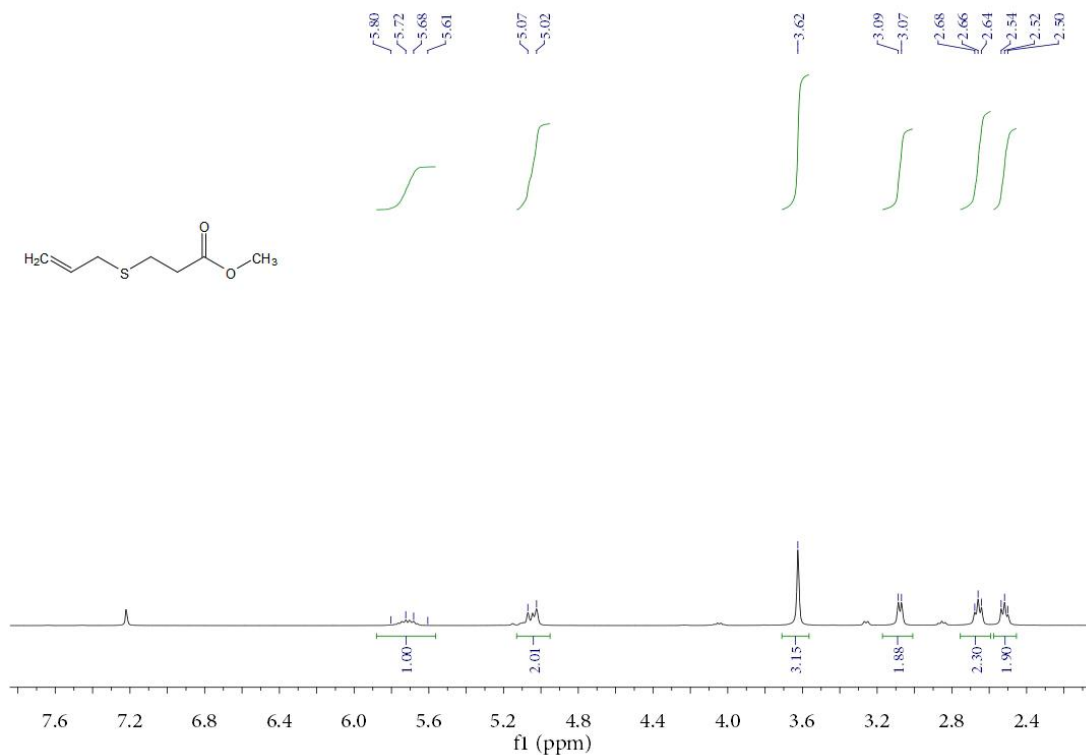

$^1\text{H}$  NMR (400 MHz,  $\text{CDCl}_3$ ) of Compound **4m**

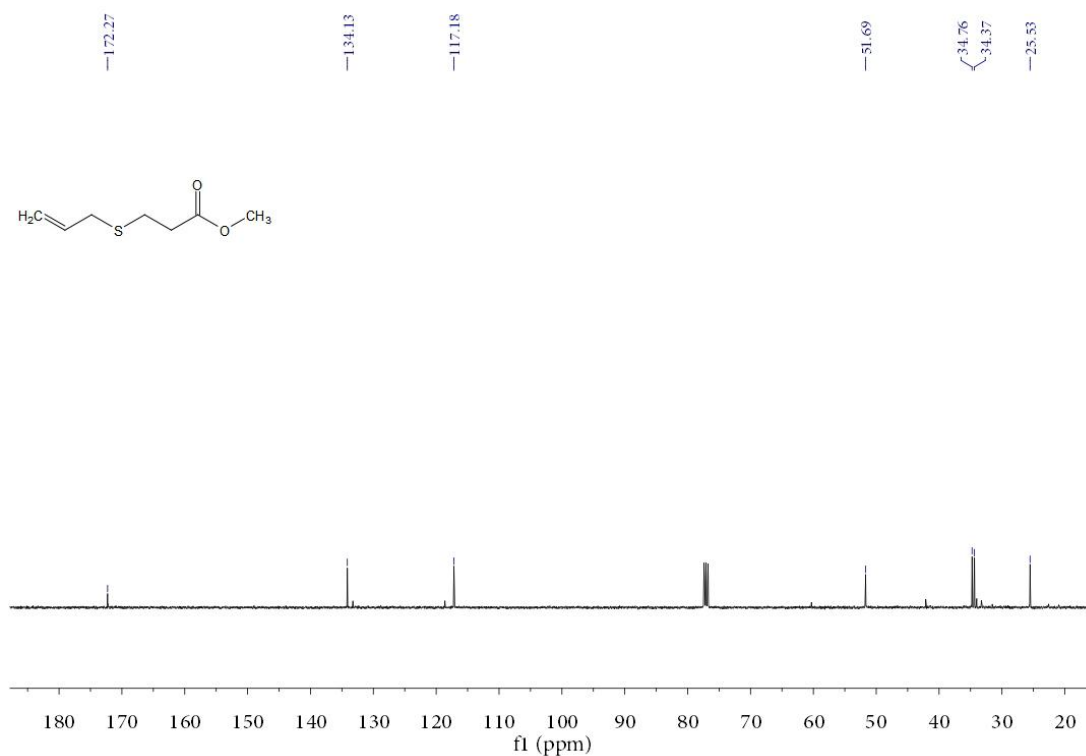

$^{13}\text{C}$  NMR(100MHz,  $\text{CDCl}_3$ ) of Compound **4m**

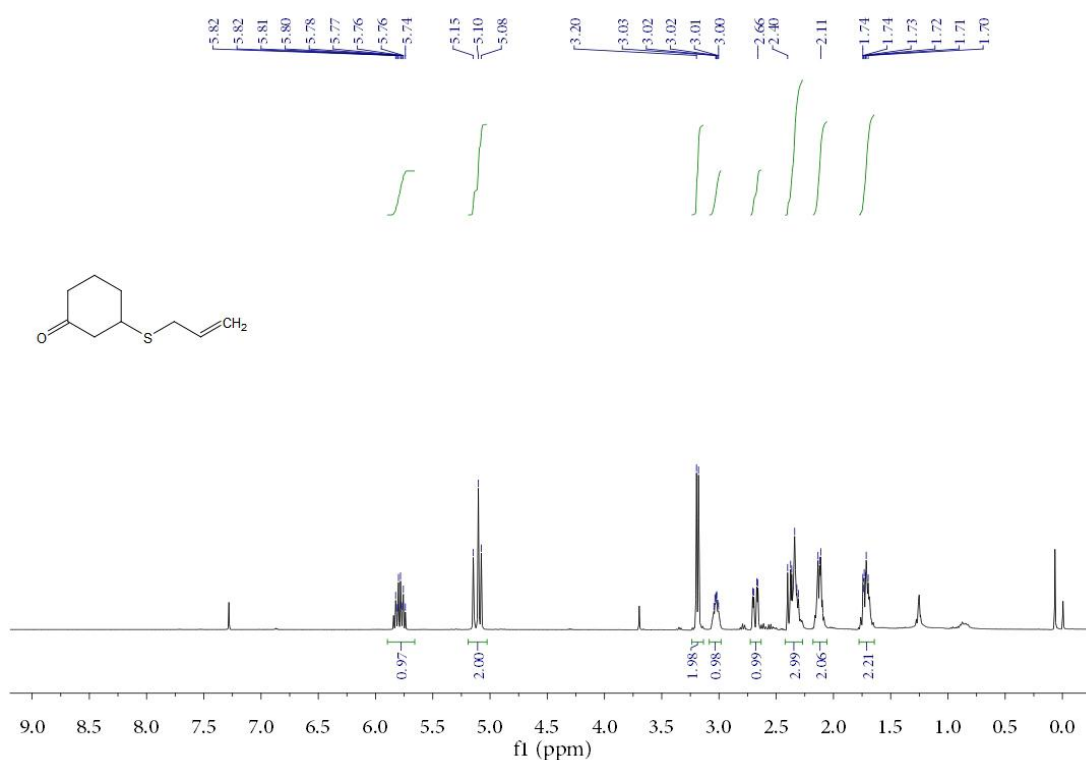

$^1\text{H}$  NMR(400MHz,  $\text{CDCl}_3$ ) of Compound **4n**

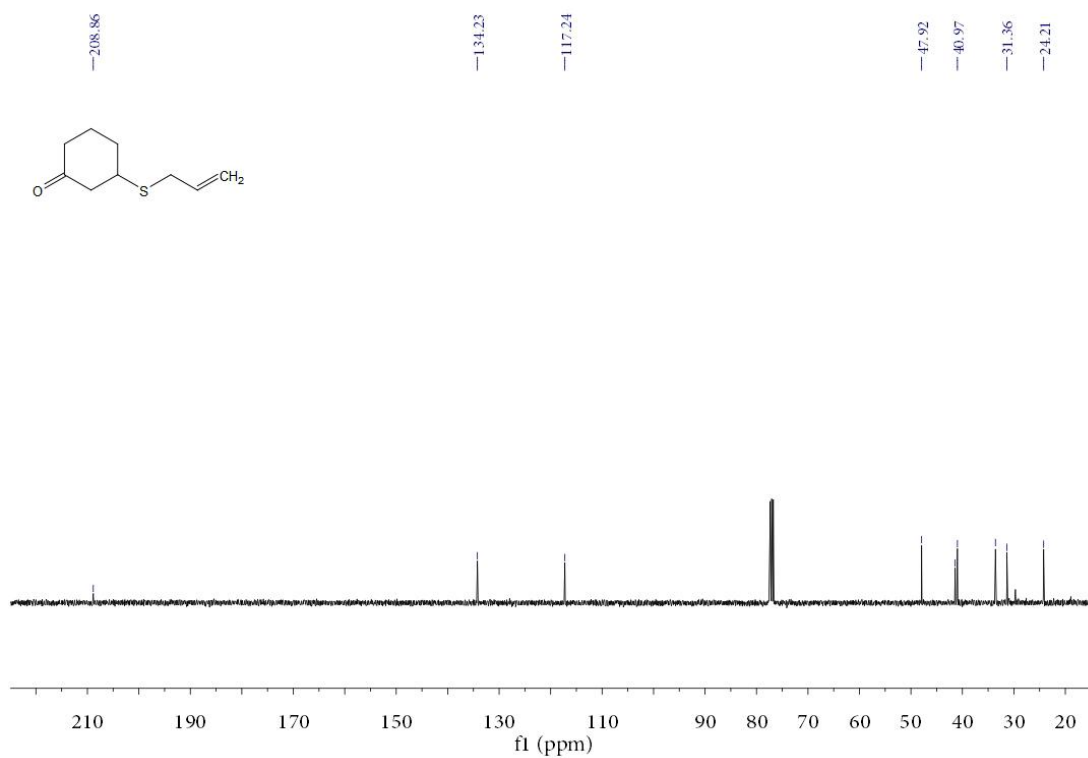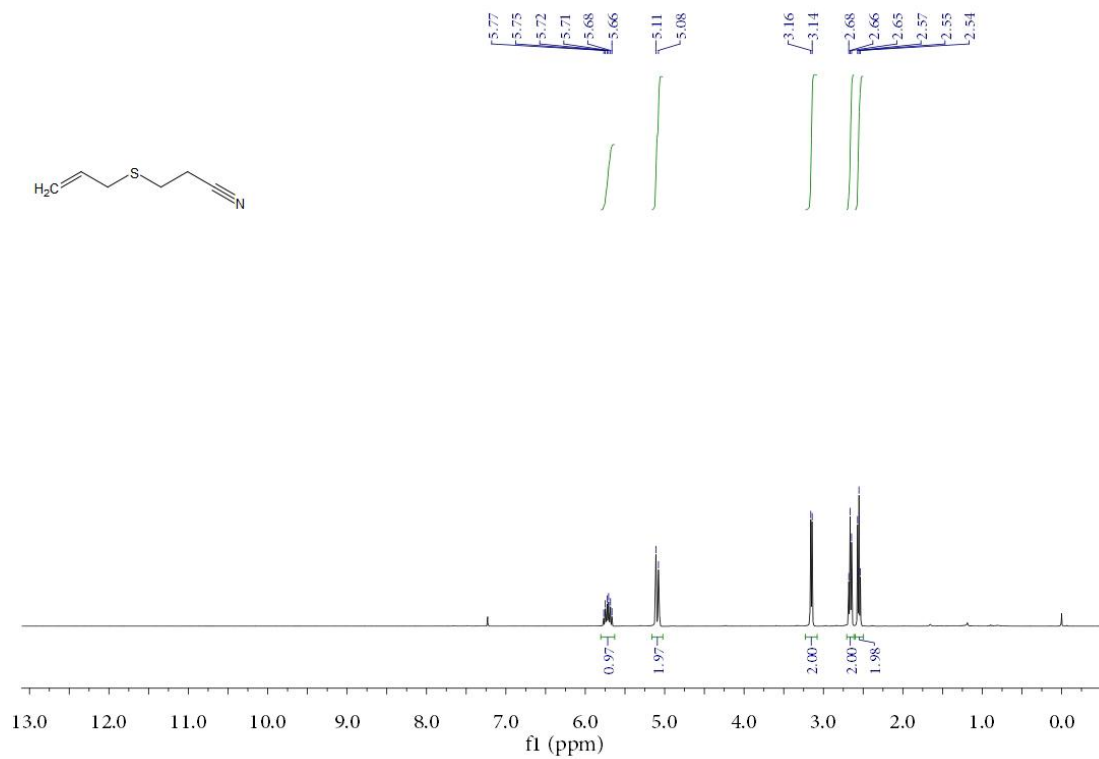

$^1\text{H}$  NMR(400MHz,  $\text{CDCl}_3$ ) of Compound **4o**

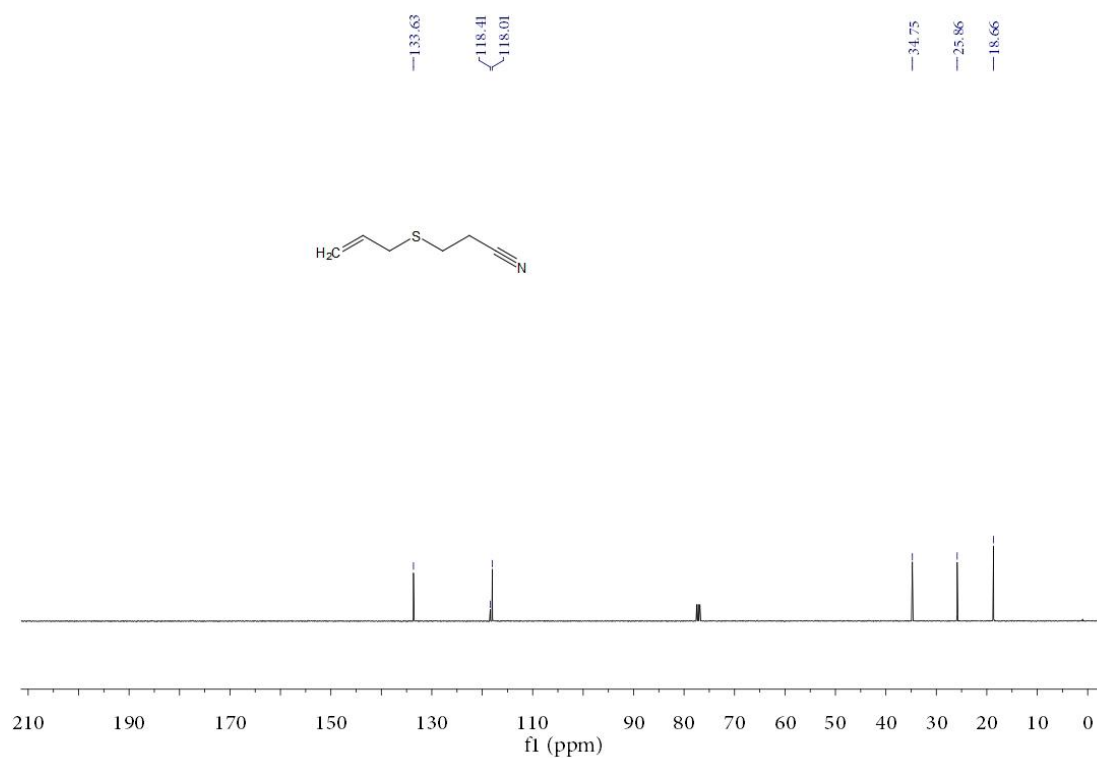

<sup>13</sup>C NMR(100MHz, CDCl<sub>3</sub>) of Compound **4o**

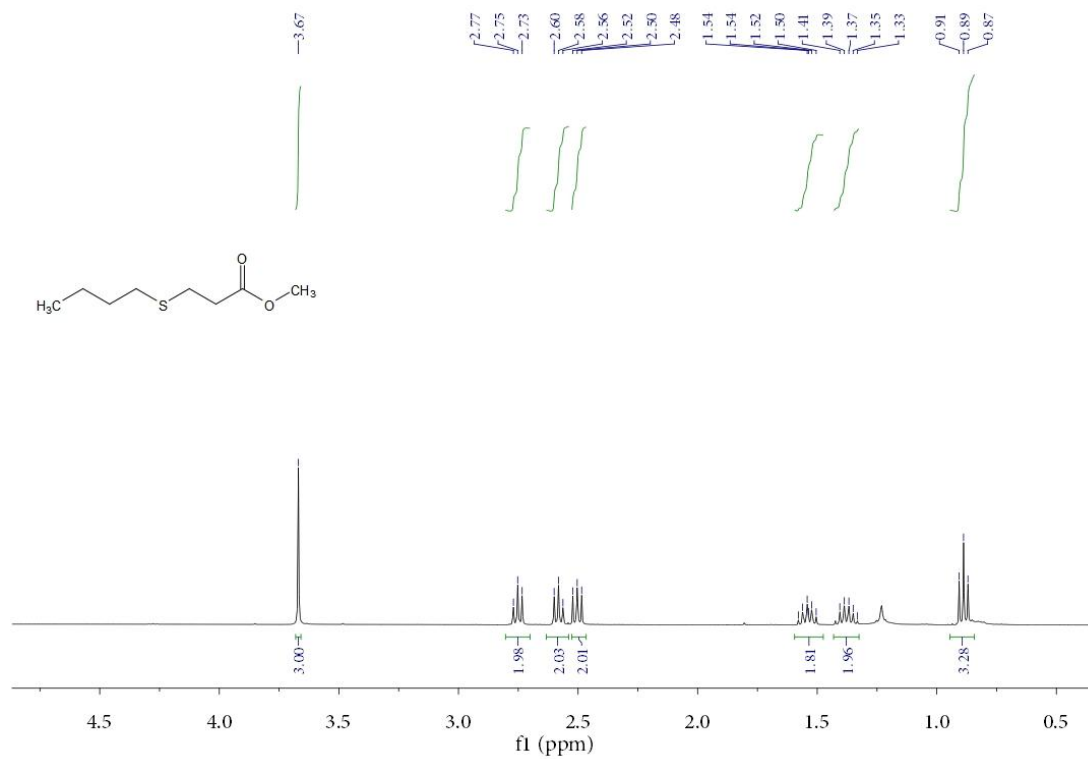

<sup>1</sup>H NMR(400MHz, CDCl<sub>3</sub>) of Compound **4p**

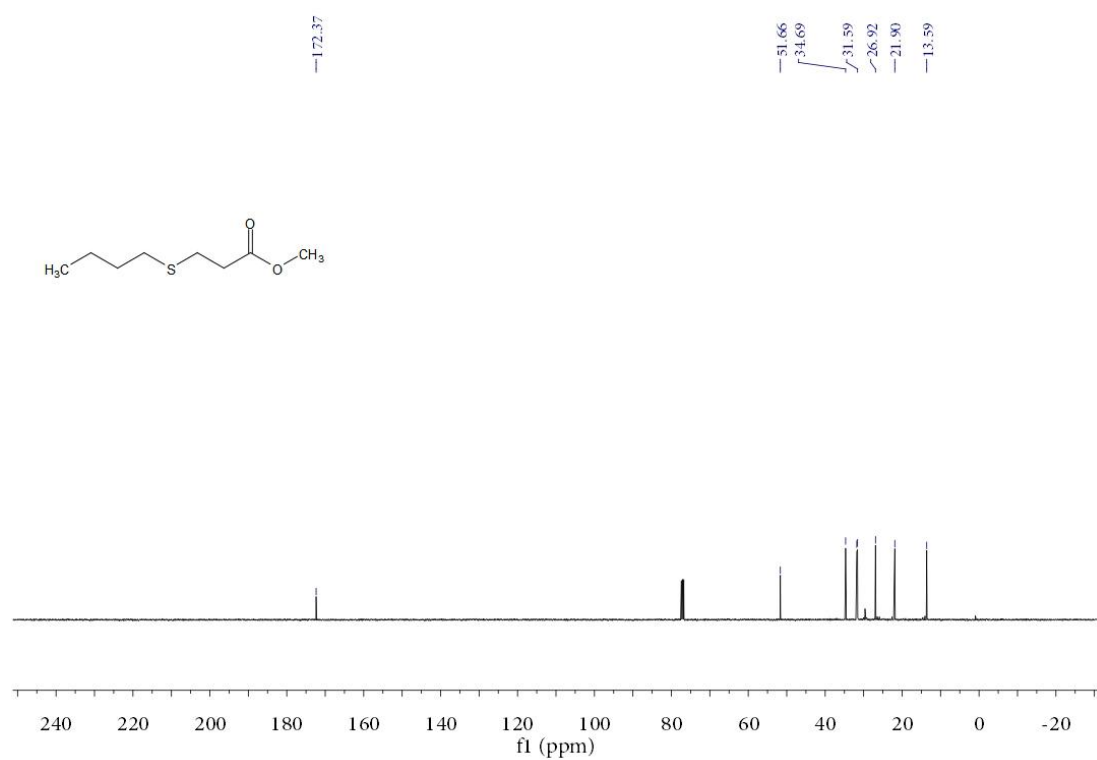

<sup>13</sup>C NMR(100MHz, CDCl<sub>3</sub>) of Compound **4p**

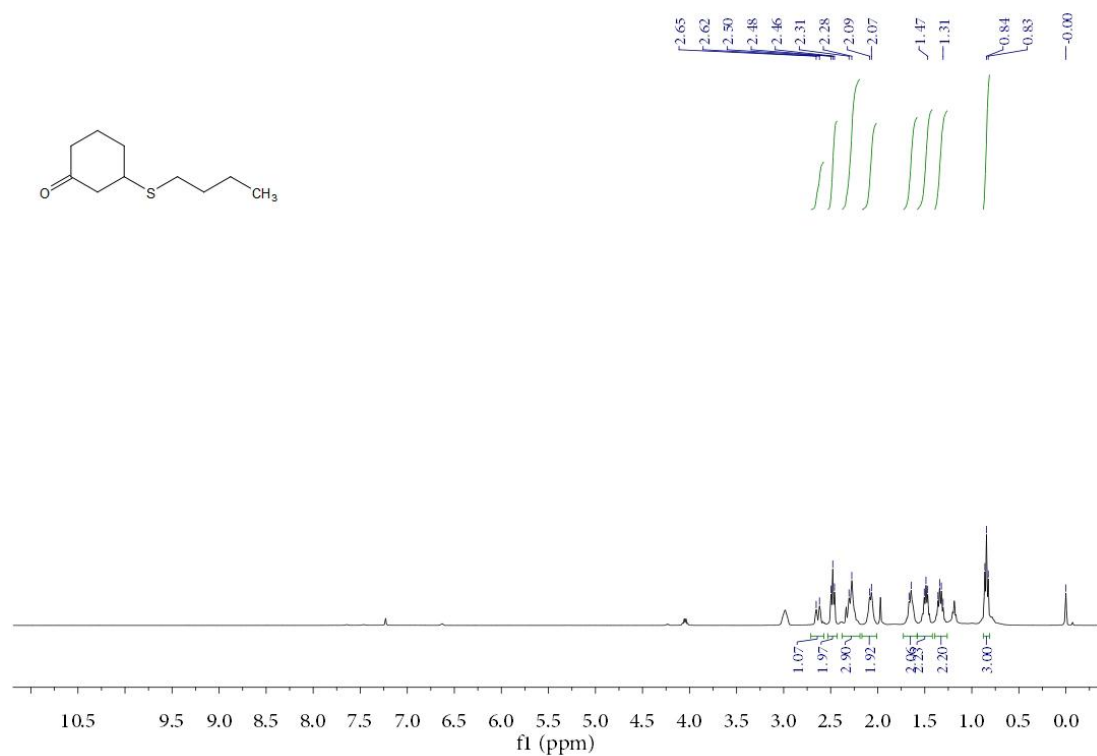

<sup>1</sup>H NMR(400MHz, CDCl<sub>3</sub>) of Compound **4q**



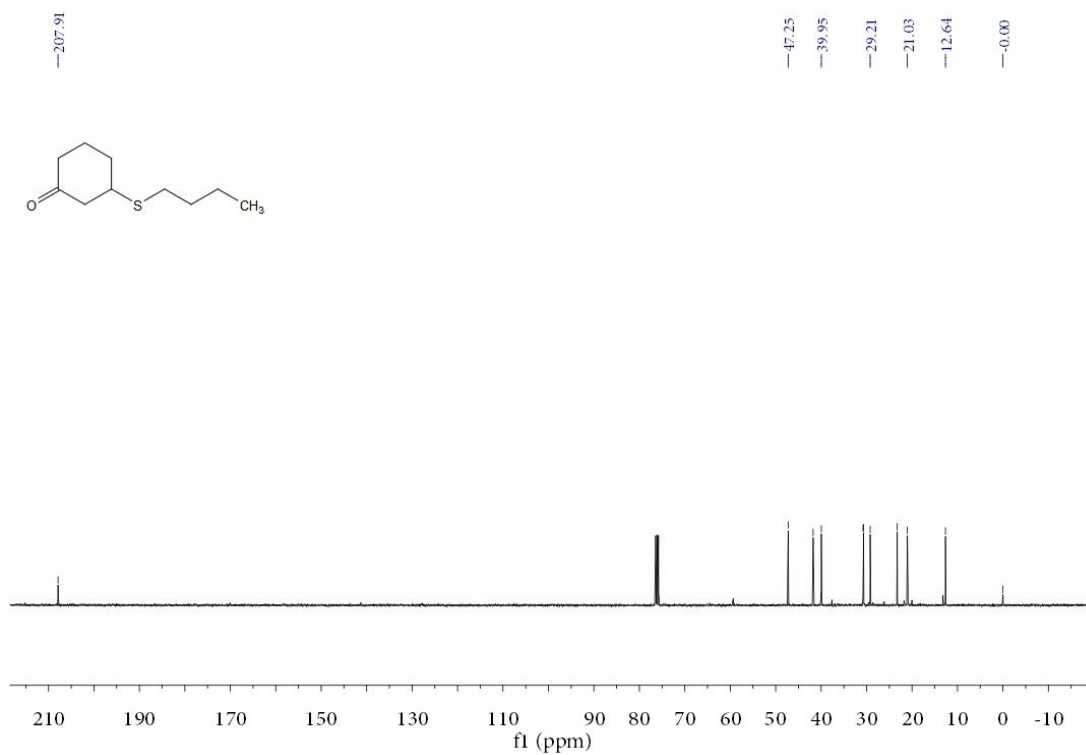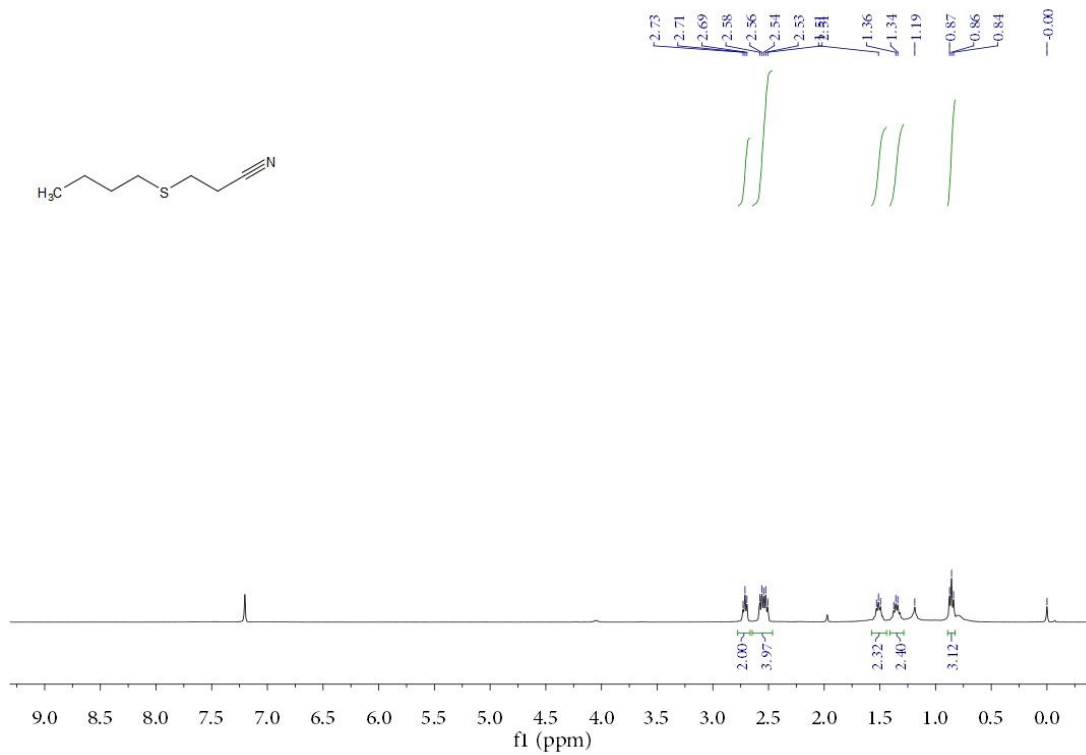

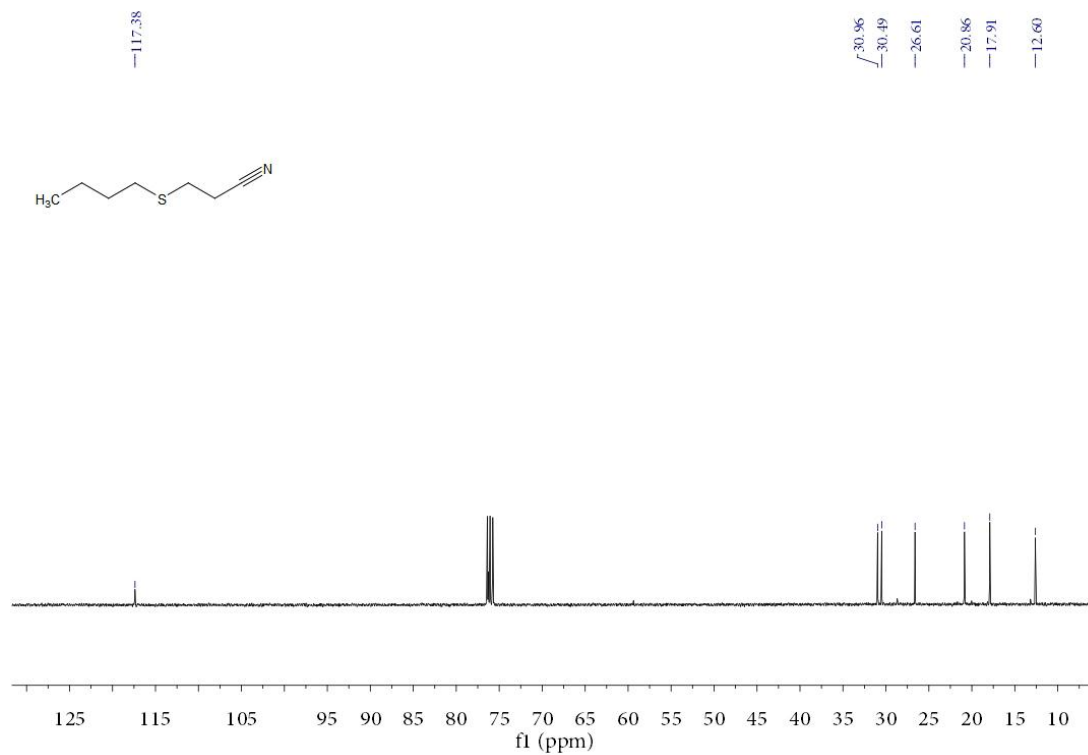

$^{13}\text{C}$  NMR(100MHz,  $\text{CDCl}_3$ ) of Compound **4r**

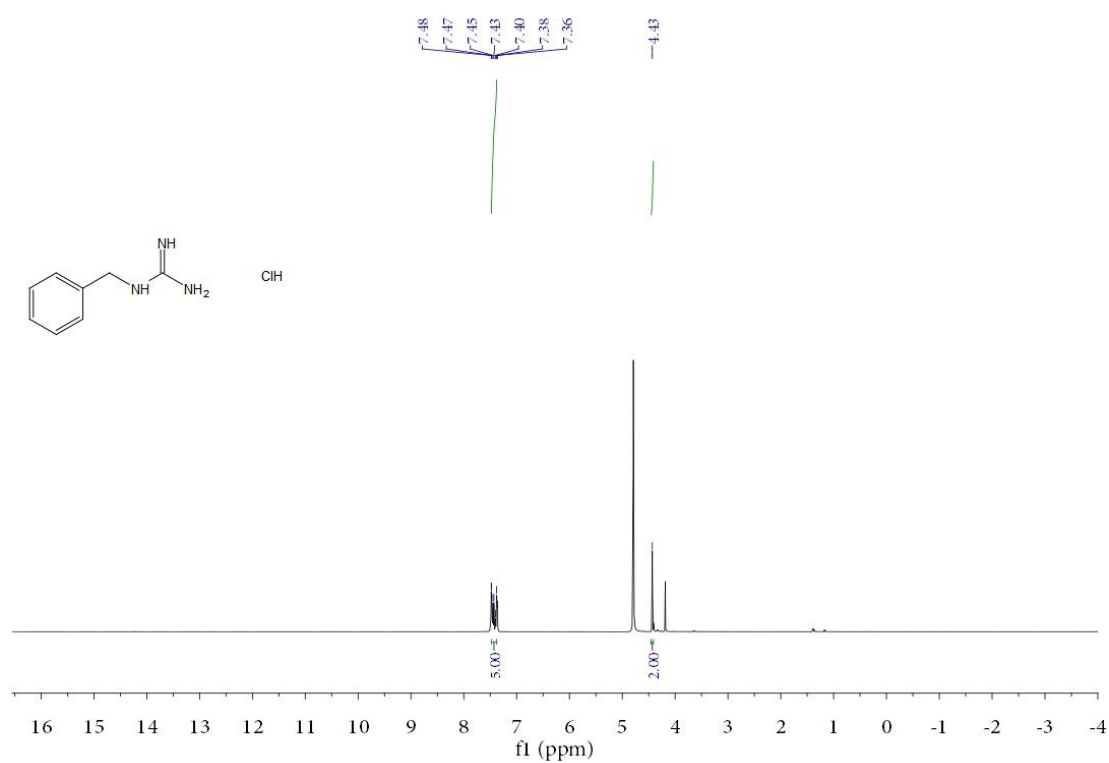

$^1\text{H}$  NMR(400MHz,  $\text{D}_2\text{O}$ ) of Compound **5a**

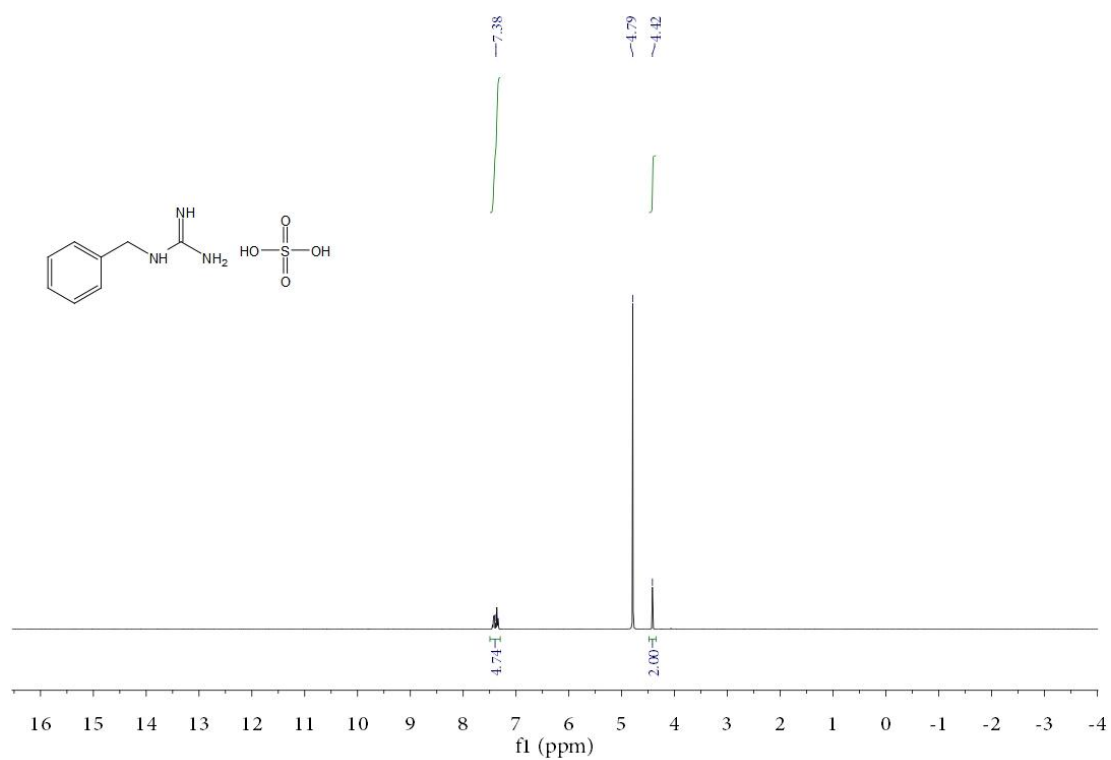

<sup>1</sup>H NMR(400MHz, D<sub>2</sub>O) of Compound **5b**

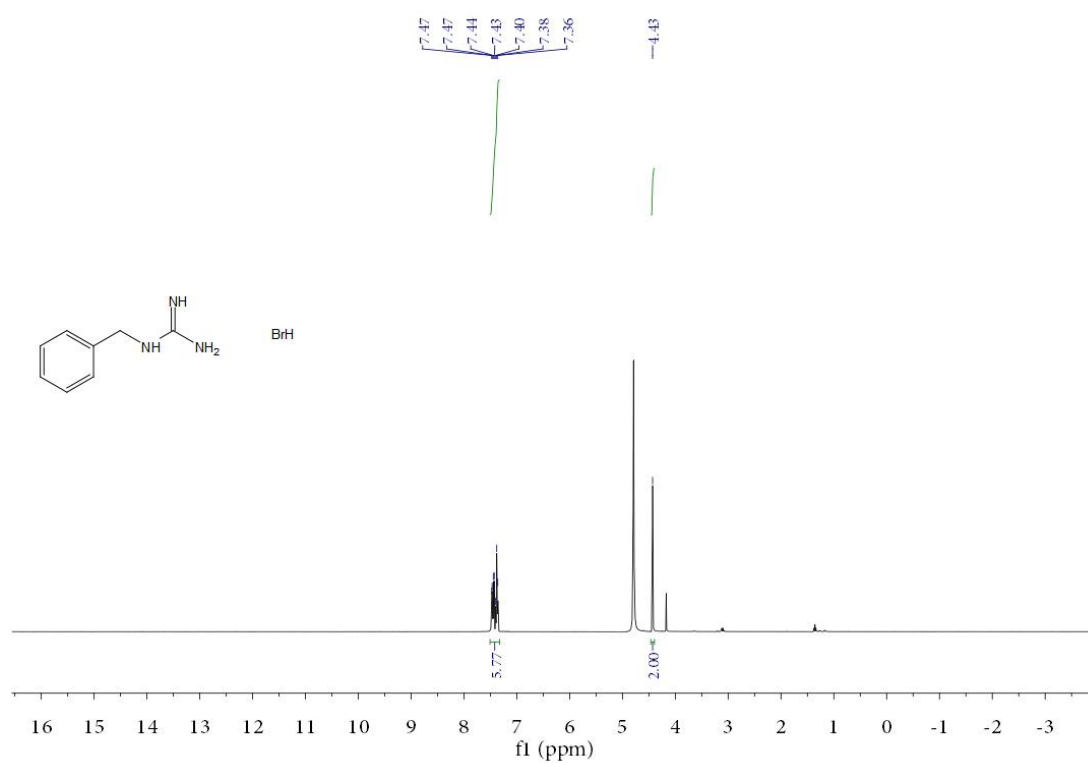

<sup>1</sup>H NMR(400MHz, D<sub>2</sub>O) of Compound **5c**

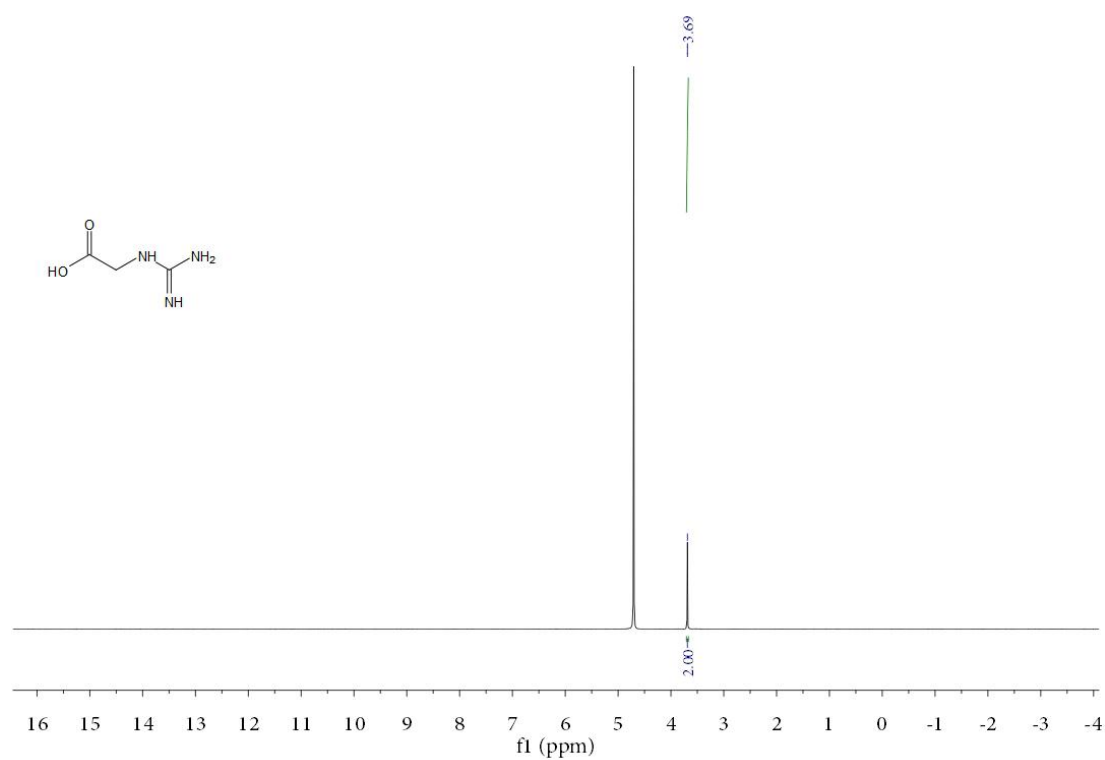

<sup>1</sup>H NMR(400MHz, D<sub>2</sub>O) of Compound **Glucocyamine**

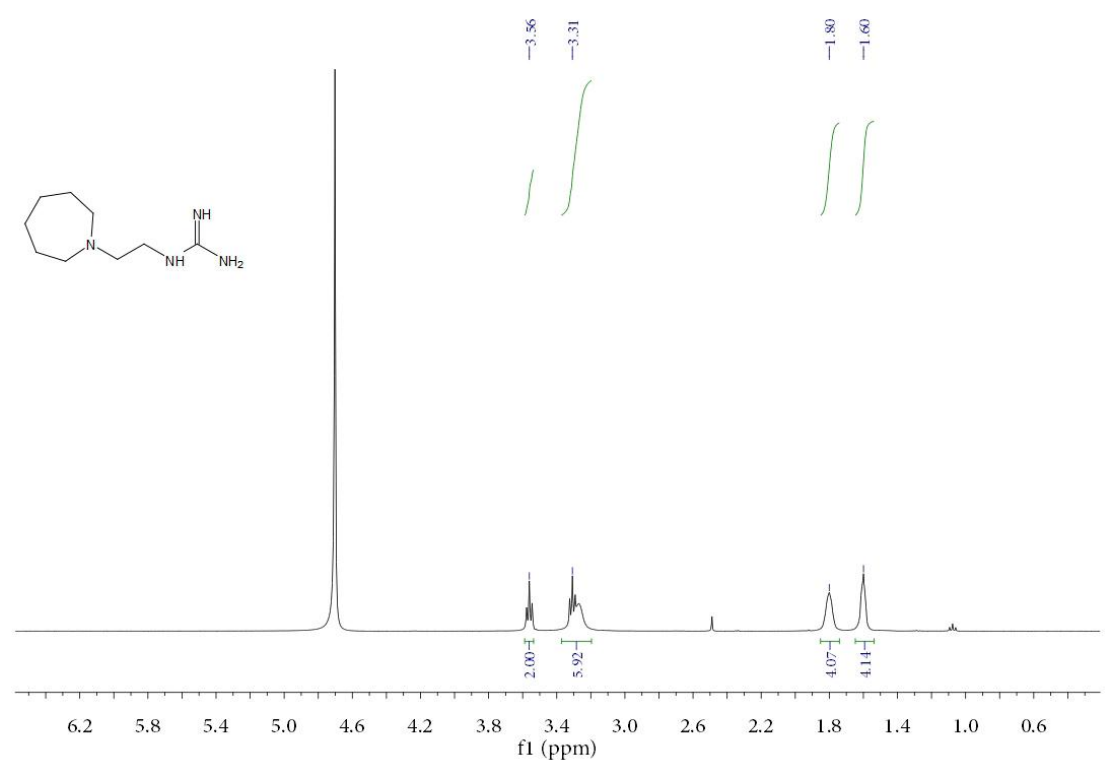

<sup>1</sup>H NMR(400MHz, D<sub>2</sub>O) of Compound **Ismelin**

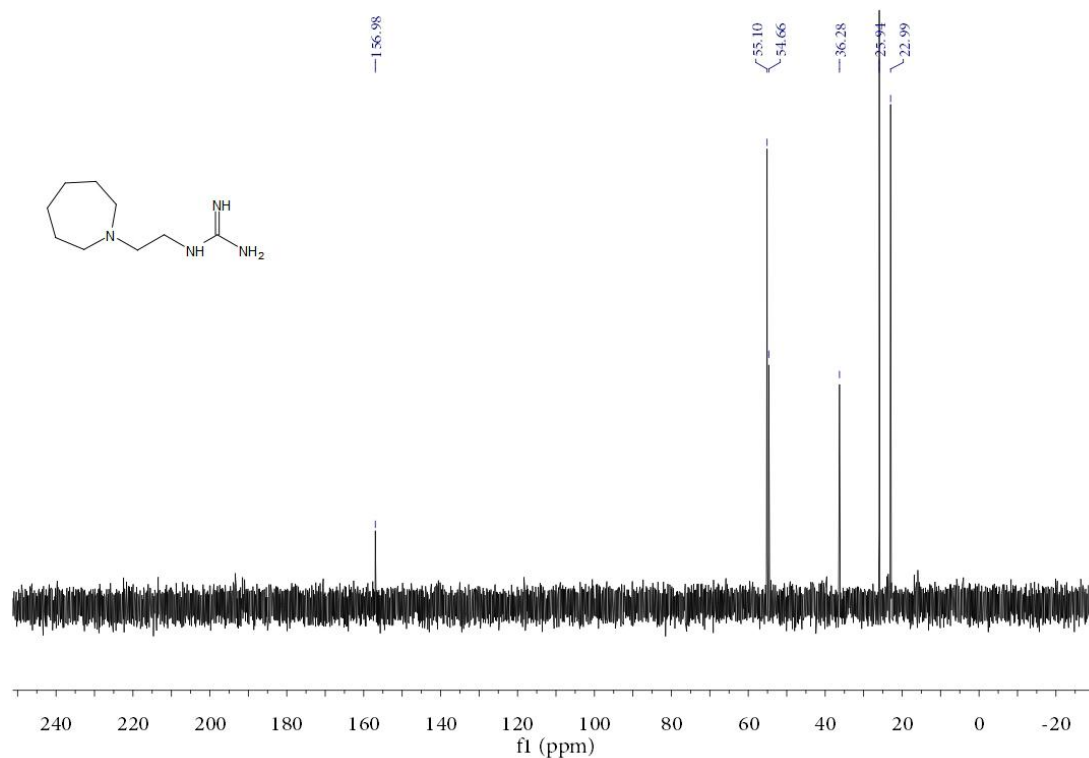

$^{13}\text{C}$  NMR(100MHz,  $\text{D}_2\text{O}$ ) of Compound Ismelin.

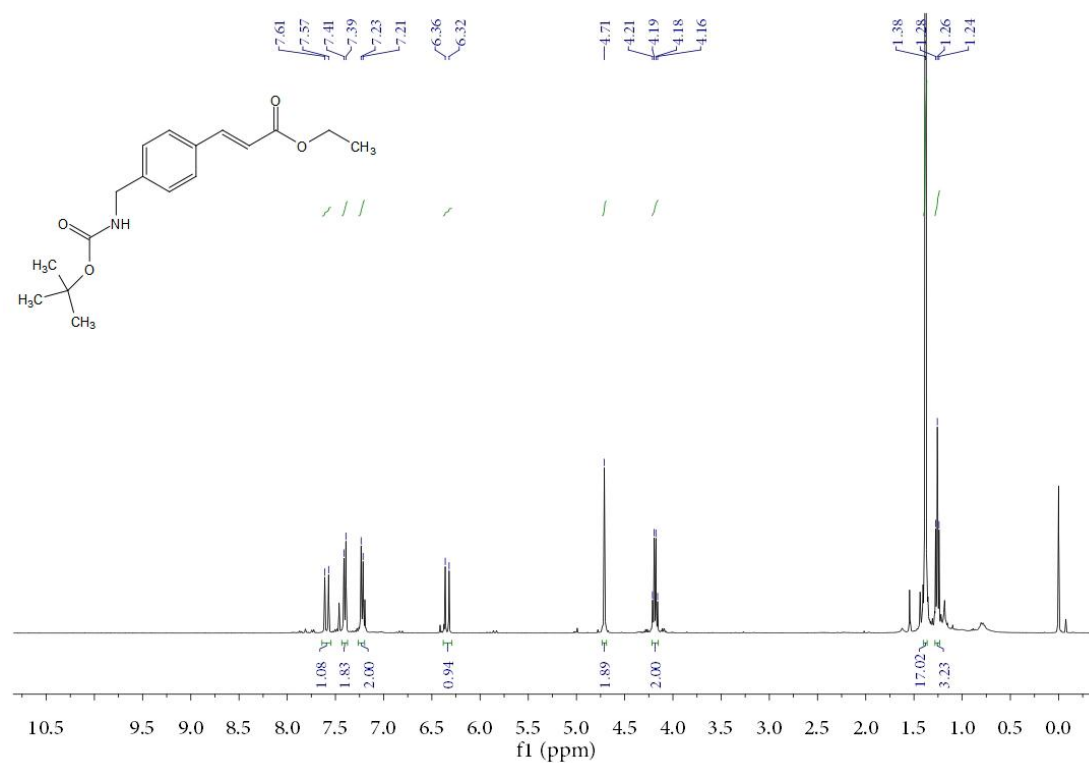

$^1\text{H}$  NMR(400MHz,  $\text{CDCl}_3$ ) of Compound 10

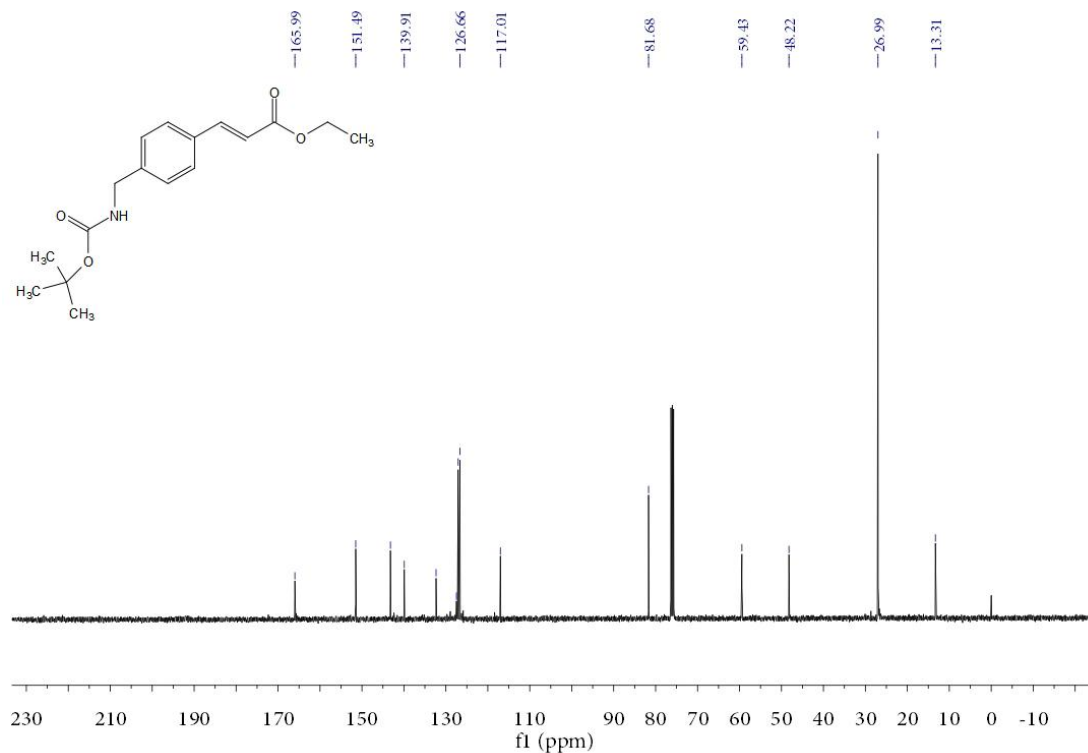

<sup>13</sup>C NMR(100MHz, CDCl<sub>3</sub>) of Compound 10

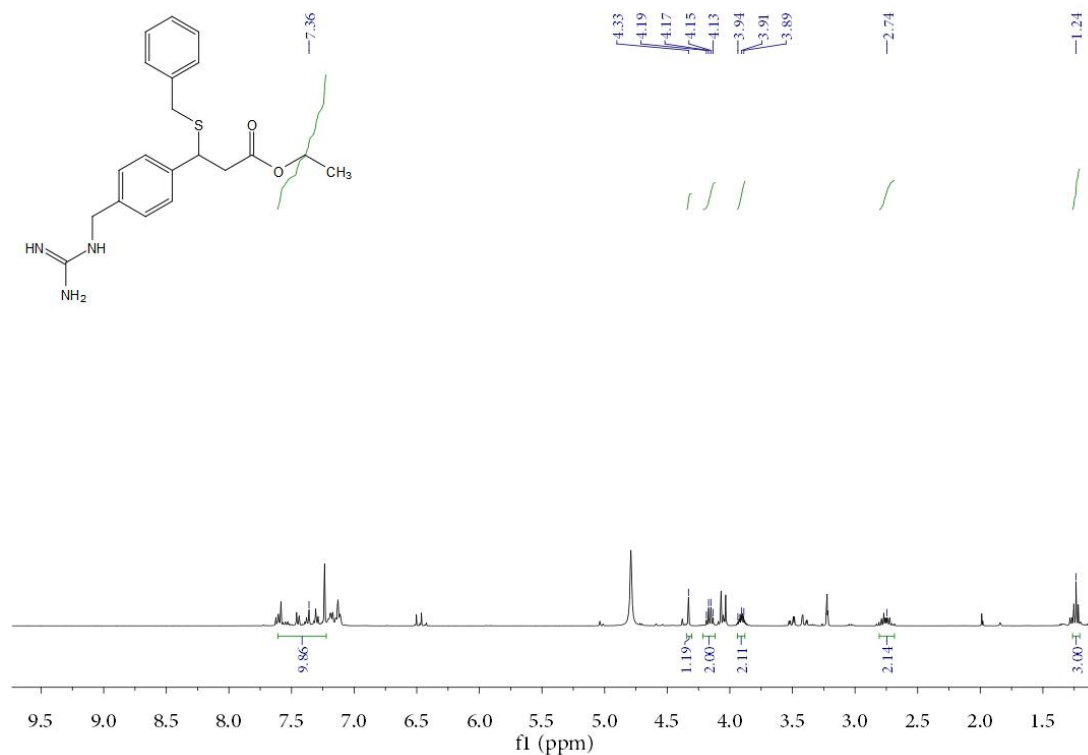

<sup>1</sup>H NMR(400MHz, CD<sub>3</sub>OD) of Compound 12

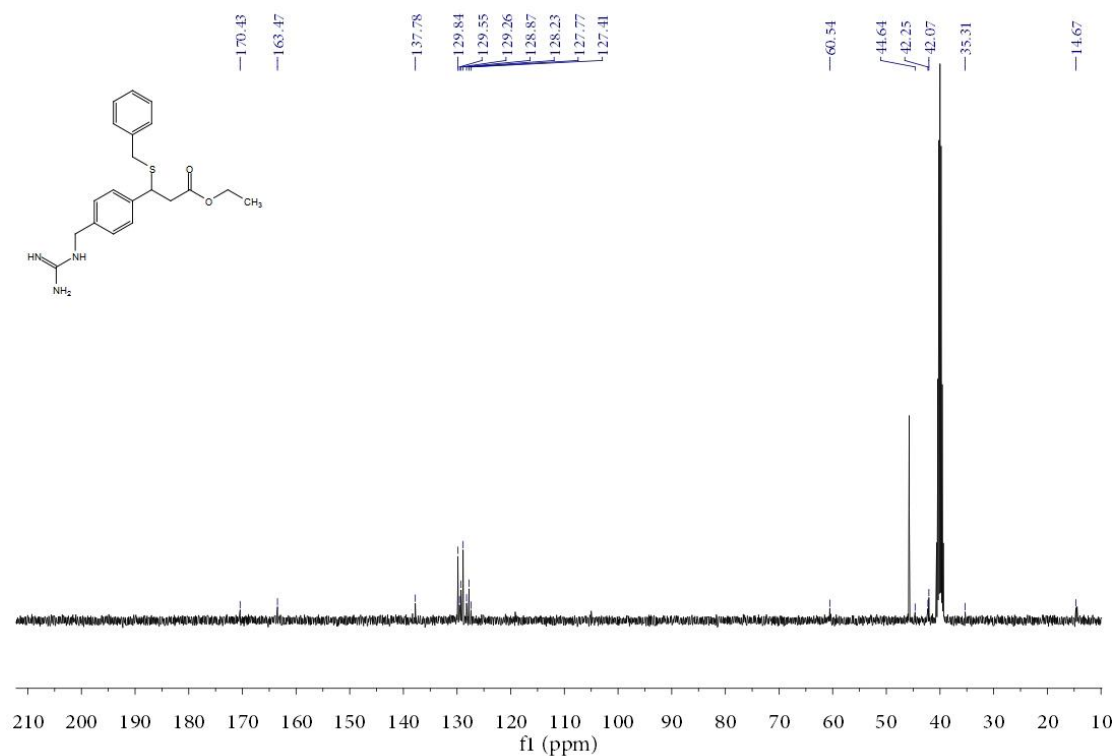

### Peking University Mass Spectrometry Sample Analysis Report

#### Analysis Info

Analysis Name 13020189\_20130226\_000001.d  
Sample G-VI  
Comment ESI Positive

Acquisition Date 2/26/2013 3:19:52 PM  
Instrument Bruker Apex IV FTMS  
Operator Peking University

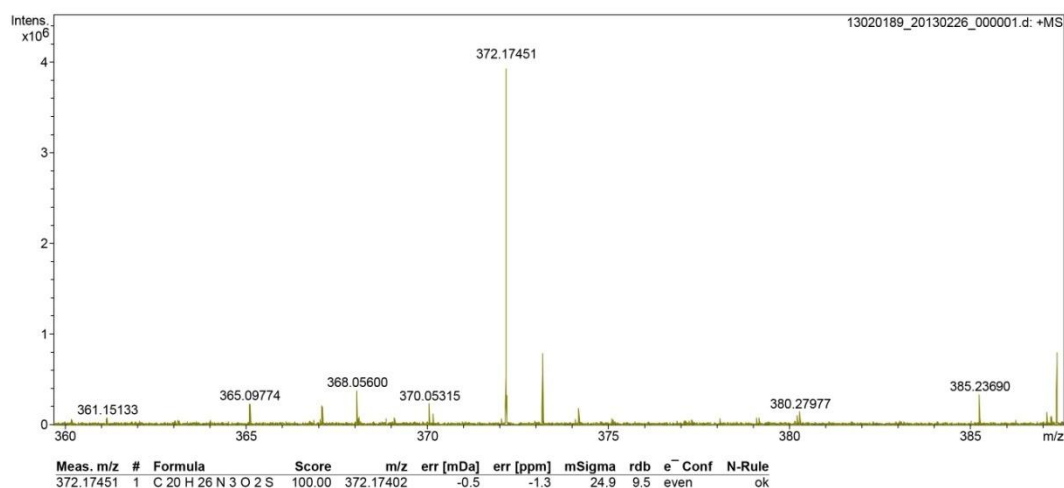

Supplement: c3ra42503g.pdf [file c3ra42503g.pdf]
